1        **The Swiss national program for the surveillance of influenza A**  
2                **viruses in pigs and humans: genetic variability and zoonotic**  
3                                **transmissions from 2010 – 2022**

4  
5    J. Lechmann<sup>1\*</sup>, A. Szelecsenyi<sup>2</sup>, S. Bruhn<sup>2</sup>, M. Harisberger<sup>3</sup>, M. Wyler<sup>4</sup>, C. Bachofen<sup>4</sup>, D.  
6    Hadorn<sup>2</sup>, K. Tobler<sup>1</sup>, F. Krauer<sup>5</sup>, C. Fraefel<sup>1</sup>, A. R. Gonçalves Cabecinhas<sup>6</sup>

7    <sup>1</sup> Institute of Virology, Vetsuisse Faculty, University of Zurich, 8057 Zurich, Switzerland

8    <sup>2</sup> Federal Food Safety and Veterinary Office FSVO, Schwarzenburgstrasse 155, 3003 Bern,  
9    Switzerland

10    <sup>3</sup> SUISAG SGD Sempach-West, Allmend 10, 6204 Sempach, Switzerland

11    <sup>4</sup> Institute of Virology and Immunology, Sensemattstrasse 293, 3147 Mittelhäusern, Switzerland

12    <sup>5</sup> Federal Office of Public Health FOPH, Schwarzenburgstrasse 157, 3003 Bern, Switzerland

13    <sup>6</sup> National Reference Centre of Influenza, Laboratory of Virology, Geneva University Hospitals,  
14    Rue Gabrielle-Perret-Gentil 4, 1211 Geneva, Switzerland

15    \*Corresponding author

16    E-Mail: [julia.lechmann@uzh.ch](mailto:julia.lechmann@uzh.ch); Phone: +41 44 635 85 30

## 17 **Abstract**

18 Influenza A viruses (IAV) are likely candidates for pandemics. This report summarizes the  
19 results of the Swiss national program for surveillance of influenza viruses in pigs and  
20 transmissions to humans between 2010 and 2022. Challenges and optimization options in the  
21 program are discussed.

22 Nasal swabs or lung tissue samples from pigs with influenza-like signs (e.g. fever, cough) were  
23 screened by real-time RT-PCR for swine influenza virus (SIV) genomes, including that of the  
24 2009 pandemic strain A(H1N1)pdm09; positive samples were subtyped for H1, N1, H3 and N2  
25 by RT-PCR and Sanger sequencing. In parallel, humans with influenza-like symptoms and  
26 recent contact with diseased pigs were asked to self-sample themselves with a nasal swab.

27 Human swabs were tested for IAV, and positive swabs further subtyped to identify potential  
28 cross-species transmission between swine and humans.

29 In the pigs, SIV was detected in 375 of 674 farm visits. H1N1 is the only subtype detected in  
30 Swiss pigs so far. The (H1N1)pdm09 strain (HA clade 1A) was only detected in seven out of 375  
31 SIV positive farm visits. Phylogenetic analyses from partial hemagglutinin (HA) and  
32 neuraminidase (NA) genome sequences indicate that the remaining pigs were infected with the  
33 Eurasian avian lineage (HA clade 1C), which is predominant in swine in Europe. The Swiss  
34 H1N1 strains form distinct clusters within HA clades 1C.2.1 and 1C.2.2 and seem to evolve  
35 comparably slowly. Infection of humans with SIV was identified in five cases. Sequence analysis  
36 assigned the five viruses to the Eurasian avian lineage (C), clades 1C.2.1 and 1C.2.2. There was  
37 no evidence for sustained human-to-human transmission.

38 Although no critical IAV variants seem to have emerged so far in Switzerland, further  
39 surveillance of influenza viruses at the swine-human interface is of major importance.

40

41 **Keywords:** human, genetic variability, influenza, surveillance, swine, Switzerland

## 42 Introduction

43 Influenza A viruses (IAV, genus *Alphainfluenzavirus*) belong to the family of  
44 *Orthomyxoviridae*, a highly heterogenic group of viruses currently comprising nine genera  
45 (<https://ictv.global/taxonomy>, accessed August 6, 2024). They are pleomorphic enveloped  
46 viruses of 80 – 120nm in diameter with a segmented single-stranded RNA genome of negative  
47 polarity of approximately 10 – 13.5kb in size (Fig. 1).

48

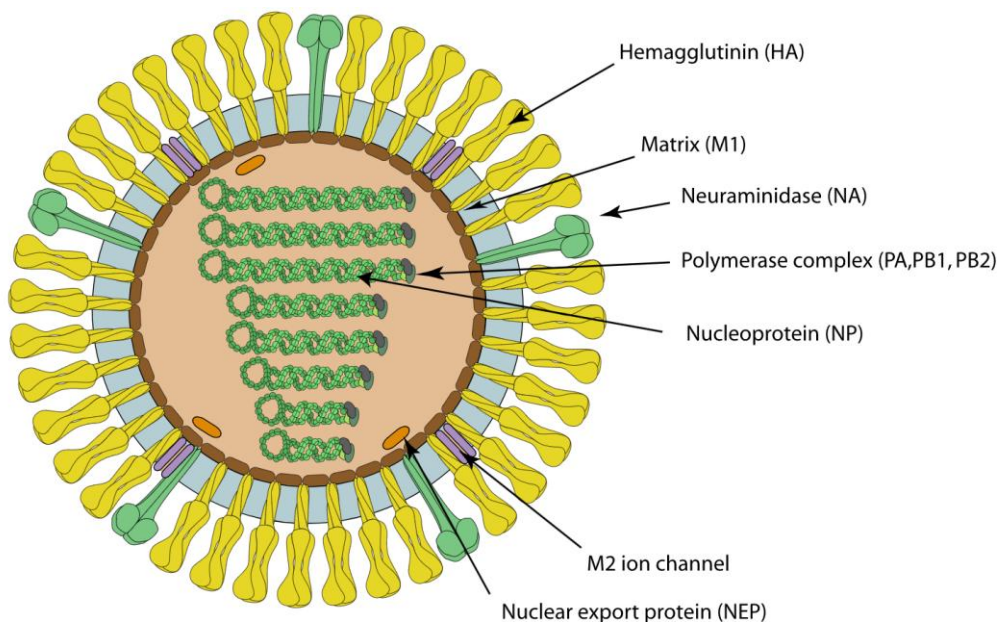

49

50 Figure 1: Influenza A virion structure (reprinted from ViralZone, SIB Swiss Institute of  
51 Bioinformatics, accessed July 28, 2023, <https://viralzone.expasy.org>).

52

53 IAVs are highly diverse and classified into subtypes, whose nomenclature is based on the genetic  
54 and antigenic properties of the two major surface glycoproteins hemagglutinin (HA) and  
55 neuraminidase (NA) (WHO, 1980). Three characteristics contribute to the rapid evolution and  
56 high diversity of IAV subtypes (Abdelwhab and Mettenleiter, 2023; Kessler et al., 2021;  
57 Krammer et al., 2018; Kuntz-Simon and Madec, 2009):

- 58 - The structural proteins HA and NA, which are responsible for attachment to the cell via the  
59 cellular receptor sialic acid (HA) and for mucus degradation in the upper respiratory tract as  
60 well as release of virus progeny from the cell after replication (NA), face strong evolutionary  
61 pressure.
- 62 - The RNA polymerase of influenza viruses lacks proofreading ability, conferring a more rapid  
63 accumulation of point mutations in the genome. In HA and NA, this process is referred to as  
64 *antigenic drift*.
- 65 - The segmented genome of IAV allows for reassortment, i.e. the reorganization of genome  
66 segments in cells co-infected with different IAVs, which may give rise to progeny viruses  
67 exhibiting markedly altered features. In HA and NA, this phenomenon is known as *antigenic*  
68 *shift*.

69 To date, 19 HA and 11 NA subtypes have been described (Karakus et al., 2024). With the  
70 exception of H17, H18, N10 and N11, which were recently detected in bats (Tong et al., 2012;  
71 Tong et al., 2013), all 17 HA and 9 NA subtypes have been detected in wild waterfowl (e.g.  
72 ducks, geese, gulls). In theory this translates into 144 different H/N combinations, of which at  
73 least 110 have been isolated to date (Pippig et al., 2016). Wild aquatic birds are therefore  
74 considered the natural reservoir of IAV (Bourret, 2018; Kessler et al., 2021). In the reservoir  
75 hosts, the virus establishes an enteric, usually asymptomatic infection and is shed via feces  
76 (Abdelwhab and Mettenleiter, 2023). Although the majority of these avian strains are host-  
77 specific, from wild waterfowl the virus can be transmitted to a wide range of other species  
78 including humans, horses, pigs, poultry, dogs, cats, ferrets, seals, mink via direct or indirect  
79 contact or aerosols (Fig 2). In most of these cross-species transmissions, viral fitness is  
80 insufficient in the new host, such that these variants undergo extinction after a few replication  
81 cycles. However, in rare cases the virus gradually adapts to the new host by accumulating  
82 mutations, allowing it to establish sustained transmission cycles within the species, species-  
83 specific lineages, and pathogenicity (Abdelwhab and Mettenleiter, 2023; Long et al., 2019).

84

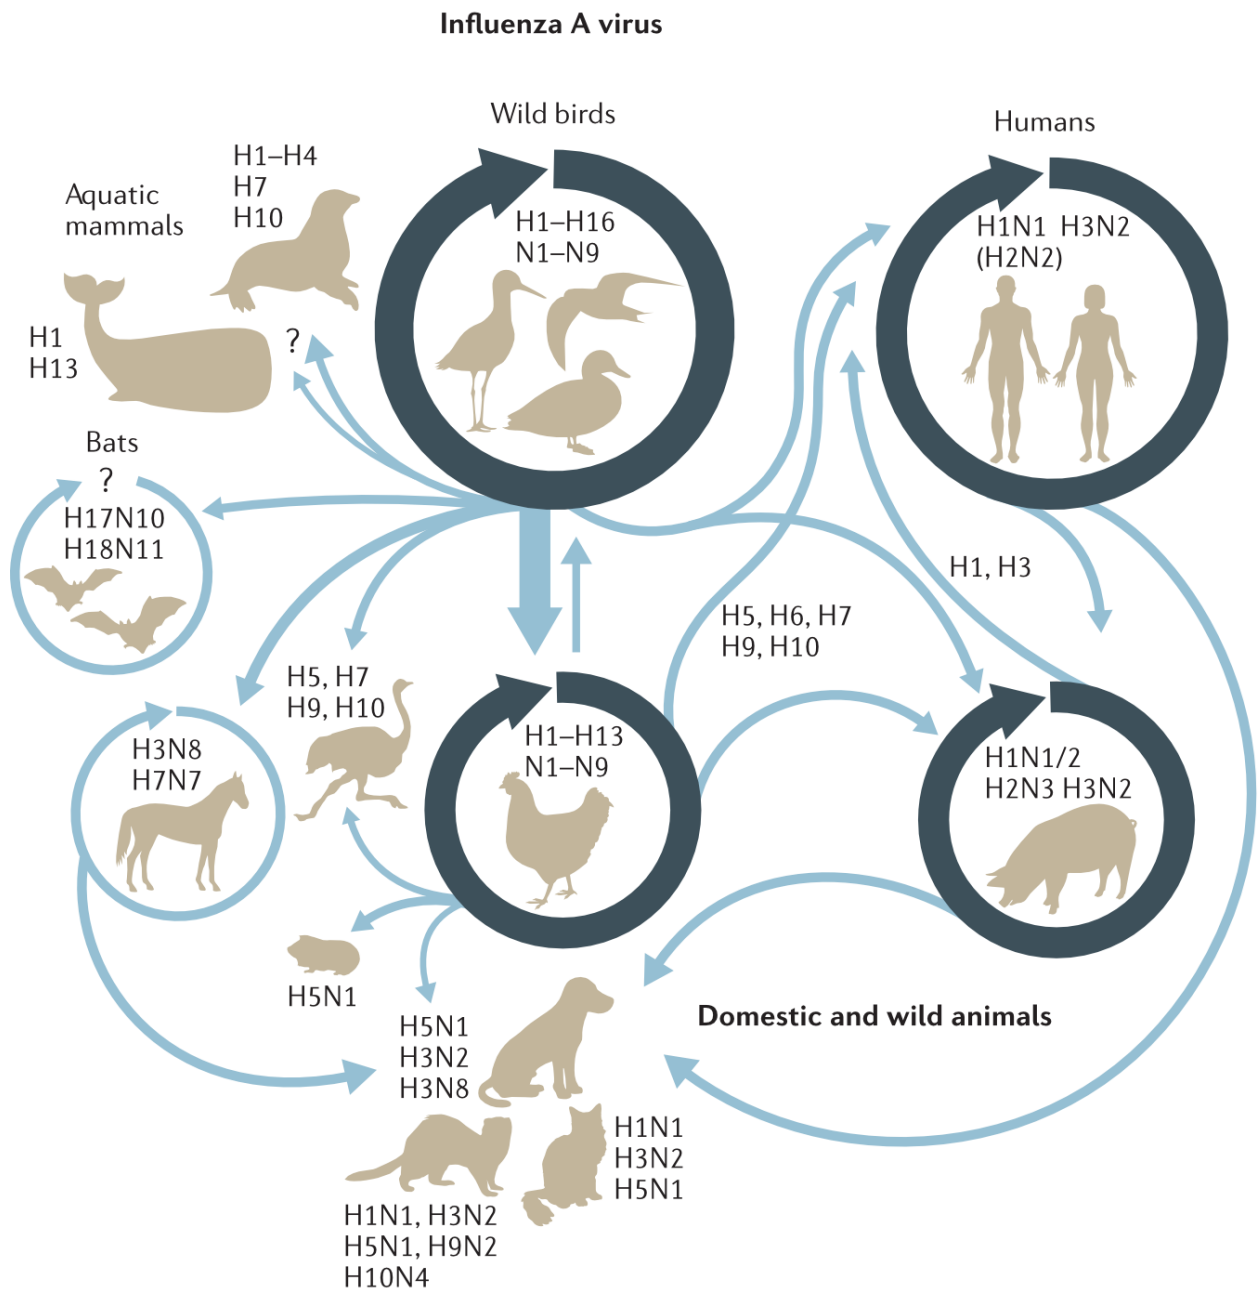

85

86 Figure 2: Interspecies transmission routes of IAV subtypes between different hosts. Subtypes  
 87 from the wild bird reservoir can cross into many different species, sometimes via intermediate  
 88 hosts and sometimes requiring adaptive mutations (light blue arrows). Specific subtypes  
 89 predominate in certain species (dark blue circles) (adapted from Long et al., 2019). Having only  
 90 recently been detected for the first time H5N1 infections in cows are missing in the figure  
 91 (Eisfeld et al., 2024).

92

93 IAVs are circulating worldwide and have a high economic and health-related impact on humans  
94 and animals. In humans, pigs and horses, IAVs establish a respiratory infection with fever,  
95 headache, myalgia, lethargy, dry cough, sore throat, sneezing and nasal discharge (Kuntz-Simon  
96 and Madec, 2009; Vincent et al., 2020). Asymptomatic infection may also occur. The incubation  
97 period is between 1 and 3 days. Infection is usually self-limiting with recovery beginning 4 – 7  
98 days after onset of clinical symptoms (Vincent et al., 2020). However, especially in young and  
99 immunocompromised humans and animals severe illness with secondary bacterial infections and  
100 pneumonia can develop and eventually lead to death (Abdelwhab and Mettenleiter, 2023;  
101 Krammer et al., 2018). The viruses are shed in nasal secretions and transmitted via direct contact  
102 between infected animals, indirect contact with virus-contaminated fomites, or through  
103 inhalation of aerosols (Nguyen et al., 2023). In swine, influenza is considered one of the most  
104 important pathogens of the respiratory disease complex, causing high economic losses due to  
105 poor performance and prolonged fattening periods (Ma, 2020).

106 In poultry and wild birds, a distinction is made between low (LPAI) and highly pathogenic avian  
107 influenza viruses (HPAI). While LPAI can cause mild disease, HPAI carry a specific mutation in  
108 the HA gene allowing it to spread systemically and cause a highly lethal disease not only  
109 affecting the respiratory, but also the gastrointestinal tract and the central nervous system of the  
110 birds (Taubenberger, 2019).

111 Continuous zoonotic and reverse zoonotic transmission of IAVs, especially between humans,  
112 swine and birds gives rise to endemic/enzootic strains but also to strains with pandemic potential  
113 (Abdelwhab and Mettenleiter, 2023; Kessler et al., 2021; Rajao et al., 2019). Endemic/enzootic  
114 IAV strains usually are the result of *antigenic drift* with subsequent minor changes in virus  
115 biology. These strains are constantly present in a confined region or population, at least partially  
116 recognized by the host's immune system, and characterized by high morbidity (up to 100%) and  
117 low mortality (< 1%) (Vincent et al., 2020). The predominant endemic/enzootic IAVs currently  
118 circulating in pigs and humans are of the H1N1 and H3N2 subtypes (Fig. 2). However, porcine

119 and human strains are antigenically and genetically distinct from each other (Krammer et al.,  
120 2018; Kuntz-Simon and Madec, 2009; Lewis et al., 2016). Pandemic strains, on the other hand,  
121 most often emerge upon *antigenic shift*, which is associated with abrupt changes in the antigenic  
122 properties of HA and NA. After infection with these strains, the host immune response is facing  
123 new epitopes, which are not or insufficiently covered by the immunological memory. Pandemic  
124 strains are characterized by rapid worldwide spread, high morbidity, more severe clinical signs,  
125 and potentially increased lethality (Krammer et al., 2018). Due to increasing immunity in the  
126 population and antigenic drift, pandemic strains may become endemic and replace the ones that  
127 previously circulated seasonally. The most recent example of strain replacement is the 2009  
128 influenza H1N1 pandemic virus A(H1N1)pdm09 that replaced the former seasonal A(H1N1) in  
129 humans (Long et al., 2019). Since the beginning of the 20th century, humanity was struck by  
130 four IAV pandemics, three of which were of avian (H1N1 Spanish Flu 1918, H2N2 Asian Flu  
131 1957 and H3N2 Hong Kong Flu 1968) and one of porcine origin (H1N1pdm09 2009) (Long et  
132 al., 2019, Saunders-Hastings and Krewski, 2016).

133 The cell receptor is a major determinant in host susceptibility to influenza viruses (Abdelwhab  
134 and Mettenleiter, 2023; Long et al., 2019). Owing to the location and density of cell receptors  
135 and the tropism of IAV, swine are considered a key species of concern in the emergence of  
136 pandemic strains (Bourret, 2018): human IAV strains have higher binding specificity to host  
137 glycoproteins containing sialic acid moieties in  $\alpha$ 2,6-galactose-linkage, which are most  
138 abundantly expressed in epithelial cells of the human upper respiratory tract. In contrast, avian  
139 strains preferentially bind to  $\alpha$ 2,3-galactose-linked sialic acid, which in avian species is present  
140 in the upper and the lower respiratory tract as well as the intestines, in humans, however, in the  
141 less accessible lower respiratory tract. Given the presence of both cell receptor types in pigs, it  
142 has long been believed that swine take on the role of a mixing vessel for viruses of human and  
143 avian origin, giving rise to novel reassorted variants to which humans are immunologically naive  
144 and highly susceptible. However, considering recent studies on the types and distribution of cell



145 receptors in other species, the assumption that pigs are unique in expressing both receptor types  
146 and thus in being susceptible to infection by both avian and mammalian-adapted influenza  
147 strains no longer seems to be valid (Abdelwhab and Mettenleiter, 2023; de Graaf and Fouchier,  
148 2014; Kuchipudi et al., 2021; Liu et al., 2023; Long et al., 2019). Instead, it is now hypothesized  
149 that additional factors determine receptor-specificity and pathogenesis, e.g. viral proteins NS1,  
150 polymerases, NA, and the host immune response (de Graaf and Fouchier, 2014) and that pigs  
151 serve as intermediate hosts in which pre-adaptation of avian subtypes to humans occurs (i.e., a  
152 gradual shift in IAV binding specificity for  $\alpha$ 2,3-gal to  $\alpha$ 2,6-gal sialic acid) thereby favoring  
153 transmission to humans (Bourret, 2018; Kuntz-Simon and Madec, 2009; Liu et al., 2023; Su et  
154 al., 2021). Thus, the pigs' key role in IAV evolution is thought to be less related to physiological  
155 conditions than to husbandry practices where pigs and wild birds or poultry are kept in close  
156 proximity to each other, which increases the risk of interspecies transmissions (Long et al.,  
157 2019).

158 The risk of the emergence of novel influenza virus strains and global spread has risen  
159 significantly in recent decades due to the intensified livestock farming, invasion of wildlife  
160 habitats for agricultural use, and increasing transboundary movement of animals, humans, and  
161 goods (Kessler et al., 2021; Saunders-Hastings and Krewski, 2016). As a matter of fact, the first  
162 infections of HPAI H5N1 in dairy cattle have only recently been reported from the U.S.A.  
163 Interestingly, the virus replicates mainly in the mammary gland. Transmission between cattle is  
164 therefore thought to occur mainly through the milking process. From the cows, the infection has  
165 spilled over to humans, cats, rodents and poultry, highlighting the potential public health risk of  
166 this current outbreak (Eisfeld et al., 2024).

167 Given its potential role as a breeding ground and transmitter of new, potentially pandemic  
168 strains, surveillance of influenza viruses in pigs is of high importance. In the context of the 2009  
169 pandemic caused by the originally porcine influenza virus A(H1N1)pdm09, the influenza virus  
170 surveillance in humans and pigs launched in 2001 in Switzerland was intensified. In



171 collaboration with the Federal Food Safety and Veterinary Office (FSVO), the Federal Office of  
172 Public Health (FOPH), the Institute of Virology at the Vetsuisse Faculty of the University of  
173 Zurich, the National Reference Centre of Influenza (NRCI) at the University Hospital in Geneva  
174 and the Pig Health Service of SUISAG, a national program for surveillance of influenza viruses  
175 in pigs and in-contact humans was initiated, the aims of which were the following:

- 176 – Detection and molecular characterization of IAVs circulating in Swiss pigs and in-contact  
177 persons showing influenza-like symptoms, with a focus on HA and NA genes
- 178 – Where available, comparison of the genome sequences obtained from pigs and in-contact  
179 humans to identify potential cross-species transmission
- 180 – Early identification of the emergence of new IAV subtypes and changes in the epidemiologic  
181 situation in pigs

182 This study aims to present the results of the Swiss national program for the surveillance of  
183 influenza viruses in pigs and humans from 2010 – 2022, to discuss challenges in the success of  
184 national influenza virus surveillance and opportunities for optimization. The study does not  
185 claim to assess the prevalence of IAV in pigs.

## 186 **Material and methods**

187

### 188 **Ethics statement**

189 Porcine samples were taken by veterinarians (Pig Health Service, herd or private veterinarians)  
190 from clinically ill pigs and possibly contact animals with suspect SIV infection. The farms were  
191 located all over Switzerland.

192 The human samples from the target population (persons with influenza-like symptoms and recent  
193 contact with diseased pigs) were obtained by self-sampling. Based on an official letter from the  
194 Federal Office of Public Health (FOPH) stating that human data and samples were collected in  
195 accordance with the Swiss Epidemics Act (EpG SR 818.101), the cantonal ethics committee of  
196 Zurich waived ethical approval for this work (BASEC Req-2024-01630).

197

### 198 **Sampling of pigs and humans**

199 Within the scope of the monitoring program, pig farmers were asked to report pigs with  
200 influenza-like signs such as cough and fever to the Pig Health Service. Nasal swabs (UTM  
201 Universal transport medium; Copan, Brescia, Italy) were then collected from acutely diseased  
202 pigs and contact animals by a veterinarian of the Pig Health Service, a herd veterinarian, or a  
203 private veterinarian. Persons with influenza-like symptoms and recent contact to these pigs were  
204 asked to swab themselves. Consenting individuals were provided with flexible minitip  
205 FLOQSwabs (Copan) and 3ml UTM tubes for self-sampling. In absence of recent influenza-like  
206 symptoms in humans, three (2010 – 2014) or two pigs (2015 – 2022) per farm were sampled.  
207 Three pigs were sampled if in-contact humans were symptomatic. In addition to the specimens  
208 collected on-site, nasal swabs (UTM, Copan), lung tissue or dry lung swabs from pigs with  
209 suspected influenza infection were collected by institutes of veterinary pathology. Porcine  
210 samples were analyzed at the Institute of Virology, University of Zurich. Human samples were

211 analyzed at the National Reference Centre of Influenza (NRCI) in Geneva. The samples were  
212 kept at 4°C (short term) or -20°C (long term) (Fig. 3).

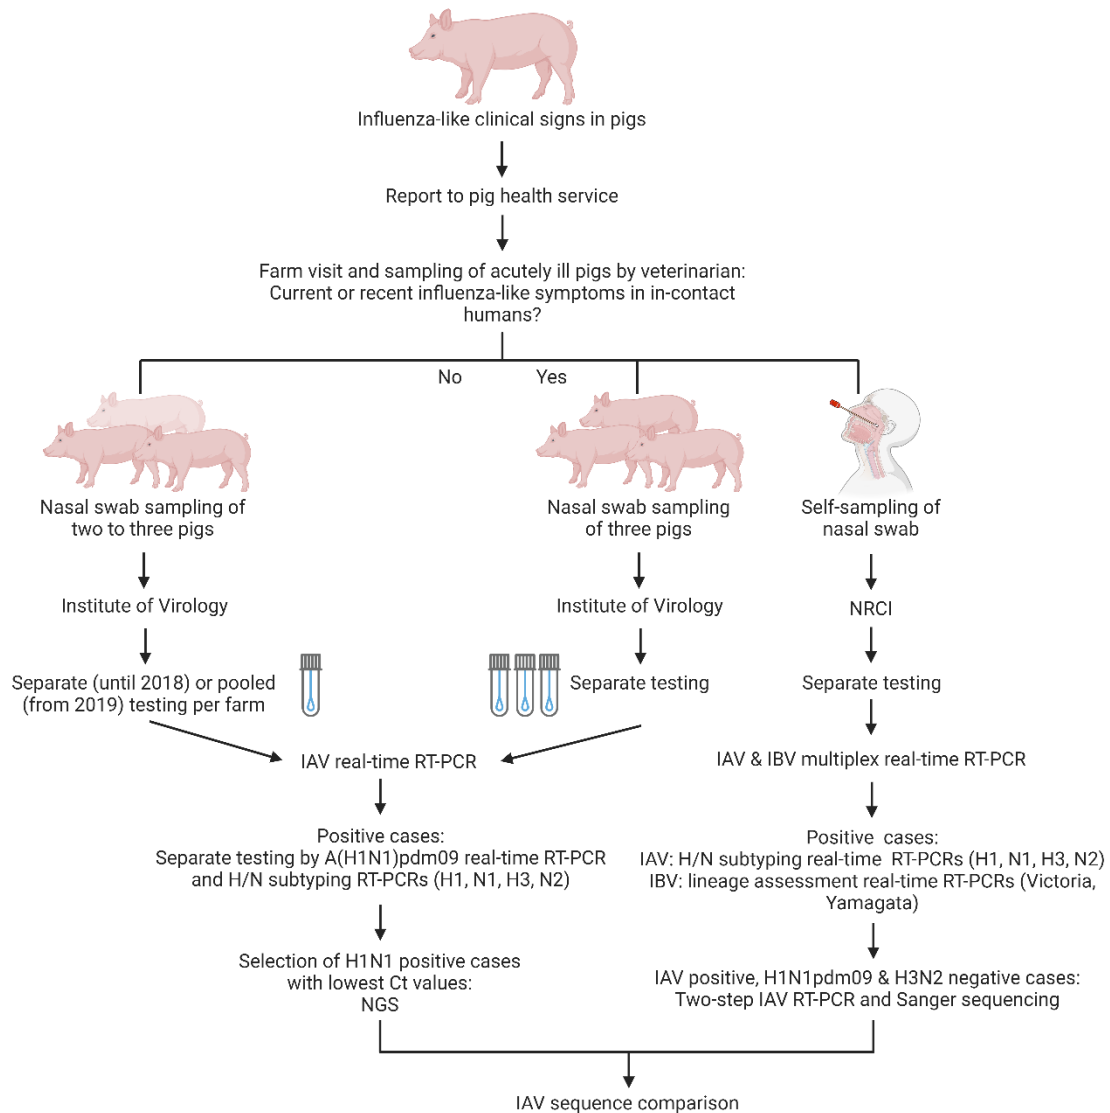

213  
214 Figure 3: Workflow of sampling and testing of porcine and human nasal swab samples for IAV  
215 in the context of the Swiss national SIV monitoring program. A part of the porcine samples was  
216 subjected to Illumina whole-genome sequencing, the results of which will be published  
217 elsewhere. Human samples were additionally tested for Influenza B virus (IBV). (Figure created  
218 with BioRender.com)  
219

## 220 **Testing of porcine samples**

221 Until 2018, all porcine swabs were examined separately. From 2019, in case of absence of recent  
222 influenza-like symptoms in humans the samples were pooled, yielding a single sample per farm.  
223 If human samples were collected due to suspect influenza cases, the porcine samples on the  
224 respective farm were always analyzed individually (Fig. 3). The nasal swabs were thoroughly  
225 vortexed and centrifuged at 2671 x g (Heraeus Multifuge 3S-R, Thermo Scientific) for 10 min at  
226 room temperature (RT). The supernatant of each swab was mixed with antibiotic and  
227 antimycotic solution (100X, Sigma-Aldrich, St. Louis, U.S.). For pooling, 80 – 100µl of each  
228 supernatant were added to 560µl AVL buffer containing 5.6µl carrier RNA (QIAamp Viral RNA  
229 Mini Kit, Qiagen). The mixture was thoroughly vortexed and incubated for at least 10 min at RT.  
230 Lung tissue or lung swabs from institutes of veterinary pathology were pooled per farm. The dry  
231 swabs from lung tissue were immersed in 140µl PBS, thoroughly vortexed and centrifuged for 5  
232 min at 16'000 x g. Lung tissue was subjected to three freeze-thaw cycles, centrifuged and 140µl  
233 of supernatant were used for RNA extraction. The supernatants of lung tissue and lung swabs  
234 were mixed with 560µl AVL buffer containing 5.6µl carrier RNA. Extraction was carried out  
235 according to the manufacturer's instructions (QIAamp Viral RNA Mini Kit, Qiagen). If not  
236 processed immediately, the RNA was stored at -20°C or -80°C.

237

## 238 Swine Influenza A real-time RT-PCR

239 For primary SIV detection, the extracted RNA was subjected to real-time RT-PCR targeting the  
240 matrix protein gene of IAV as well as the reference host gene GAPDH (Adiavet SIV Real Time,  
241 Adiage-ne-BioX Diagnostics, Ploufragan, France). Samples were tested in duplicate, using 20µl  
242 master mix and 5µl RNA. Extracted RNA from SIV positive field samples served as positive  
243 control, nuclease-free water and an extraction control without sample RNA served as negative  
244 control. RT-PCR was performed on a 7900HT Fast (Life Technologies) or a QuantStudio 7 Flex

245 Real-Time PCR System (Applied Biosystems) using the following cycle protocol: 10 min at  
246 45°C, 10 min at 95°C, 40 cycles of 15 sec at 95°C and 1 min at 60°C. Samples were considered  
247 SIV positive, if they yielded a Ct value  $\leq 40$  and if an increase in fluorescence signal was  
248 observed in the amplification and multicomponent plot.

249

#### 250 Influenza A(H1N1)pdm09 real-time RT-PCR

251 All SIV positive samples were tested in duplicate for the pandemic H1N1 strain from 2009 by a  
252 specific real-time RT-PCR. The RT-PCR mix consisted of 12.5 $\mu$ l 2x QuantiTect Probe RT-PCR  
253 Master Mix (QuantiTect Probe RT-PCR Kit, Qiagen), 1 $\mu$ g bovine serum albumin (1mg/ml;  
254 Albumin Bovine Serum Protease Free, VWR, Leuven, Belgium), 400nM of each primer, 200nM  
255 probe (Schulze et al., 2010), 0.5 $\mu$ l QuantiTect RT Mix and a top-up of 3.5 $\mu$ l nuclease-free water  
256 (Supplementary Table 1). Twenty microliters of the PCR mix were distributed onto a 96-well  
257 plate and supplemented with 5 $\mu$ l RNA. Positive and negative controls were included, and RT-  
258 PCR was performed and interpreted as described above, using the following cycling protocol: 30  
259 min at 50°C, 15 min at 95°C, 40 cycles of 15 sec at 95°C and 30 sec at 60°C.

260

#### 261 H1N1 and H3N2 subtyping RT-PCRs and Sanger sequencing

262 For subtyping, SIV positive samples were subjected to conventional RT-PCR. First, specific  
263 primers for H1 and N1 were used (H1N1 is the only SIV subtype detected in Switzerland so far).  
264 All samples that tested negative against H1 or N1 were subsequently tested for H3 and/or N2.  
265 The 25 $\mu$ l RT-PCR mix consisted of 5 $\mu$ l 5x Qiagen OneStep RT-PCR buffer (Qiagen OneStep  
266 RT-PCR Kit, Qiagen), 400nM of each dNTP (dNTP Mix, 10mM each, Qiagen), 1 $\mu$ l Qiagen  
267 OneStep RT-PCR Enzyme Mix, 600nM of each primer (Chiapponi et al., 2003), 10 $\mu$ l nuclease-  
268 free water and 5 $\mu$ l RNA (Supplementary Table 1). All samples, including positive, negative and  
269 extraction controls were tested in duplicate on a FlexCycler2 (Analytik Jena, Jena, Germany).

270 The cycling protocol included an initial step of 30 min at 48°C, followed by 10 min at 95°C and  
271 40 cycles of 1 min at 95°C, 1 min at 50°C and 1 min at 72°C, and a final elongation for 7 min at  
272 72°C. PCR products were analyzed in a 1.5% or 2% agarose gel containing GelRed Nucleic Acid  
273 Stain (10'000X, Biotium, Hayward, CA, U.S.). Bands of the expected size were excised, and  
274 DNA extracted using the QIAquick Gel Extraction Kit (Qiagen). For Sanger sequencing  
275 (Microsynth, Balgach, Switzerland), the total DNA concentration was measured by  
276 spectrophotometry (Nanodrop, Thermo Fisher Scientific, Kloten, Switzerland), and  
277 approximately 45ng DNA were mixed with 20µM of the respective primer forward and reverse  
278 and topped-up with nuclease-free water to a final volume of 15µl. Sequences were analyzed with  
279 NCBI nucleotide BLAST (<https://blast.ncbi.nlm.nih.gov>; Altschul et al., 1990)

280

#### 281 Sequence analysis and generation of phylogenetic trees

282 Trimming of the ends resulted in HA and NA sequences of up to 392 and 457 nucleotides,  
283 respectively. Sanger sequencing traces were processed using *Tracy* (v0.7.6, Rausch et al., 2020)  
284 with default parameters. For samples with a single trace, the *basecall* module was used, whereas  
285 for samples with multiple traces and/or replicates, the *assemble* subcommand was applied.  
286 Subsequently, sequences for each segment were aligned using *MAFFT* (v7.310, Katoh et al.,  
287 2002) with the options *--reorder --adjustdirectionaccurately --op 5*. The resulting alignments  
288 were manually curated and trimmed. The phylogenetic relationships of the sequences were  
289 inferred using the maximum-likelihood nearest-neighbor interchange algorithm implemented in  
290 *FastTree2* (v2.1.10, Price et al., 2010). The trees were rerooted using the *root* command from the  
291 *ape* package (v5.8, Paradis et al., 2004) with AB628080/JX138509 and AB628082 used as roots  
292 for the HA and NA trees, respectively. Graphical representation of the trees was generated using  
293 *ggtree* (v3.12.0, Yu et al., 2017) and *ggnewscale* (v0.5.0 Campitelli, 2020).

294 Classification of HA sequences was performed using the online tool Subspecies Classification  
295 (with Swine Influenza H1 global classification,

296 <https://www.bv-brc.org/app/SubspeciesClassification>, accessed August 4, 2024). To address  
297 limitations in NA segment classification, an in-house system was developed. Briefly, the  
298 aforementioned trimmed alignments were used to calculate a phylogenetic distance matrix using  
299 FAMSA (v2.2.2, Deorowicz et al., 2016) with the settings `-square_matrix -dist_export`. The  
300 dimensionality of the resulting distance matrix was reduced using the classical multidimensional  
301 scaling (MDS) method, implemented via the `cmdscale` function in R (v4.4.0, R Core Team,  
302 2013). The visible segregation of sequences was ultimately used as an approximation for NA  
303 segment classification. All utilized scripts are available at  
304 <https://github.com/mwylerCH/SwissSIV>.  
305 All assembled Sanger sequences were deposited on GenBank under the accession numbers  
306 PQ663270 – PQ663585 (Supplementary Table 2).

307

### 308 **Testing of human samples**

309 Prior to nucleic acid extraction, 200 – 400µl of nasopharyngeal swab supernatant were spiked  
310 with 20µl of cell culture supernatant of canine distemper virus (Onderstepoort vaccine strain),  
311 which served as extraction control and to assess the presence of PCR inhibitors in the samples.  
312 Viral RNA was then extracted using Nuclisens easyMAG (2010 – 2017) and EMAG (since  
313 2018) magnetic bead systems (BioMérieux, Italy) according to the manufacturer's instructions.  
314 RNA was recovered in 25 – 50µl of NucliSens easyMAG Buffer 3. If not processed  
315 immediately, the RNA was stored at -80°C.

316

### 317 Influenza A and B duplex real-time RT-PCR

318 For primary Influenza A (IAV) and B (IBV) detection, the extracted RNA was subjected to  
319 duplex real-time RT-PCR targeting the matrix protein of IAV and the non-structural protein of  
320 IBV viruses. Extracted RNA from IAV and IBV reference strains served as extraction and



321 positive controls, and nuclease-free water (Promega, Wisconsin, U.S.) as negative control. The  
322 real-time RT-PCR mix consisted of 12.5µl of 2X Reaction Mix with ROX as passive reference  
323 (Invitrogen, California, U.S.), 0.5µl SuperScript III/Platinum Taq Mix (Invitrogen), 600nM of  
324 each primer, 200nM of each probe (adapted from CDC Realtime RTPCR (rRTPCR) Protocol for  
325 Detection and Characterization of Influenza (version 2007)), 4µl of nuclease-free water  
326 (Promega) and 5µl RNA (Supplementary Table 1). Real-time RT-PCR was performed on  
327 StepOnePlus and QuantStudio 5 Real-Time PCR Systems (Applied Biosystems) using the  
328 following cycling protocol: 30 min at 50°C, 2 min at 95°C, 45 cycles of 15 sec at 95°C, and 30  
329 sec at 55°C. Samples were considered positive if they yielded a Ct value  $\leq 40$  and if in the  
330 amplification and multicomponent plots an increase in fluorescent signal was be observed.

331

### 332 Influenza A subtyping and influenza B lineage assessment real-time RT-PCRs

333 Currently circulating human seasonal Influenza A subtypes are A(H1N1)pdm09 and A(H3N2).  
334 In parallel to IAV and IBV screening, all samples were subtyped using either H1pdm09 and H3  
335 specific singleplex real-time RT-PCRs (2010 – 2017) or a quadruplex real-time RT-PCR  
336 targeting H1pdm09 and H3, as well as N1 and N2 genes (since 2018). Lineage (Yamagata and  
337 Victoria) was assessed for IBV positive samples (Fig. 3). Extracted RNA from Influenza  
338 A(H3N2), A(H1N1)pdm09, Influenza B Yamagata and Victoria reference strains served as  
339 positive controls, and nuclease-free water as negative control. The real-time RT-PCR mix  
340 consisted of 12.5µl of 2X Reaction Mix with ROX (Invitrogen), 0.5µl SuperScript III/Platinum  
341 Taq Mix (Invitrogen), 300 – 1200nM of target specific primers, 200 – 400nM of target specific  
342 probe (adapted from CDC Realtime RTPCR (rRTPCR) Protocol for Detection and  
343 Characterization of Influenza (Version 2007), Henritzi et al. (2016), Schweiger et al. (2000) and  
344 Watzinger et al. (2004)), 1µl of nuclease-free water, and 5µl RNA (Supplementary Table 1).  
345 Real-time RT-PCRs were performed as described above.

346 Suspected cases of SIV, i.e. IAV real-time RT-PCR positive or equivocal (after retesting), and  
347 H1N1 and H3N2 real-time RT-PCR negative samples were subjected to sequencing.

348  
349 RT-PCR and Sanger sequencing of samples suspected to be positive for zoonotic Influenza A  
350 Zoonotic origin of the virus was considered probable when a positive IAV real-time RT-PCR  
351 (pan A) and negative H1N1pdm09 and H3N2 subtyping real-time RT-PCRs were observed. In  
352 these cases, a conventional RT-PCR using universal IAV primers was performed, and positive  
353 samples were subjected to Sanger sequencing. In case of low yield for the universal RT-PCR, a  
354 sequential PCR using segment-specific IAV primers was attempted. The porcine origin was  
355 confirmed if by Sanger sequencing a partial or full sequence of at least one viral segment of SIV  
356 was obtained.

357 In detail, the extracted RNA (12.5 µl) was reverse transcribed into cDNA. The reaction mix  
358 consisted of 10µl of 5X First-Strand Buffer (Invitrogen), 200U of SuperScript II Reverse  
359 Transcriptase (200U/µl; Invitrogen), 40U of Protector RNase inhibitor (40U/µl; Roche  
360 Diagnostics, Mannheim, Germany), 10mM dithiothreitol (0.1M; Invitrogen), 13.5µl nuclease-  
361 free water (Promega), 1.5mM dNTP (15mM; Amersham, Buckinghamshire, U.K.), and 1µg IAV  
362 universal primer (5' – AGC AAA AGC AGG – 3'; 0.5µg/µl) (Hoffmann et al., 2001). Reverse  
363 transcription was performed at 42°C for 60 min, followed by 10 min at 95°C. The cDNA tubes  
364 were placed on ice and were either immediately processed for PCR or stored at -20°C.

365 The cDNA was used as template for amplification of the eight influenza virus genome segments  
366 using segment-specific primers (Supplementary Table 1) (Hoffmann et al., 2001). The PCR mix  
367 consisted of 5µl cDNA, 5µl 10X GeneAmp PCR buffer II (Applied Biosystems), 250nM of  
368 forward and reverse primers, 0.2mM dNTP (2.5mM; Amersham), 1% glycerol (Sigma-Aldrich,  
369 Steinheim, Germany), 1.5mM of GeneAmp MgCl<sub>2</sub> (25mM; Applied Biosystems), 1.25µl  
370 AmpliTaq DNA Polymerase (5U/µl; Invitrogen), and 14.75µl nuclease-free water (Promega).

371 The first step of the amplification run consisted of a 4 min period at 94 °C and was followed by  
372 35 cycles with the following conditions: 20 sec at 94°C, 30 sec at 58°C, and 7 min at 72°C. The  
373 program ended with one last cycle at 72 °C for 7 min.

374 For H1 and N1 genes, the resulting PCR products were sometimes subjected to additional  
375 segment-specific PCRs (i.e. nested PCR) to increase amplification yield (Supplementary Table  
376 1). PCR mix conditions are comparable to those described above but in presence of 3mM of  
377 GeneAmp MgCl<sub>2</sub> (25mM; Applied Biosystems). For H1, the amplification consisted of a 4 min  
378 period at 94 °C followed by 40 cycles with the following conditions: 15 sec at 94°C, 30 sec at  
379 50°C, and 1 min at 72°C. The program ended with one last cycle at 72 °C for 5 min. For N1  
380 gene, it consisted of one first cycle of 4 min at 94 °C, 30 sec at 50°C, and 2 min at 72°C,  
381 followed by 39 cycles of 30 sec at 94°C, 30 sec at 50°C, and 2 min at 72°C, followed by one  
382 cycle of 30 sec at 94°C, 30 sec at 50°C, and a final elongation for 10 min at 72°C.

383 Amplicons were purified using a MSB Spin PCRapace kit according to the manufacturer's  
384 instructions (Invitek Molecular GmbH, Berlin, Germany) and sequenced using strain-specific  
385 primers. Sanger sequencing was performed on an ABI 3500xL Genetic Analyzer (Applied  
386 Biosystems, Singapore). Sequences were processed and stored in SmartGene's Integrated  
387 Database Network System (IDNS) Influenza Module ([https://apps.idns-](https://apps.idns-smartgene.com/apps/Apps.po)  
388 [smartgene.com/apps/Apps.po](https://apps.idns-smartgene.com/apps/Apps.po)) and submitted to the global initiative on sharing all influenza data  
389 (GISAID) database (Shu and McCauley, 2017).

390

391 **Results**

392

393 **Porcine samples**

394 From 2010 to 2022, a total of 2303 cases of pigs with influenza-like signs were reported from

395 approximately 1400 farms in Switzerland (Fig. 4). Over the years, the number of reports of farms

396 with pigs showing influenza-like signs has continuously decreased from 320 in 2010 to 105 in

397 2022 (Fig. 5) (FSVO, 2023). The number of reports was evenly distributed over the entire area

398 with pig husbandry (Fig. 4) and on average was highest in the last quarter of the year (Fig. 6).

399

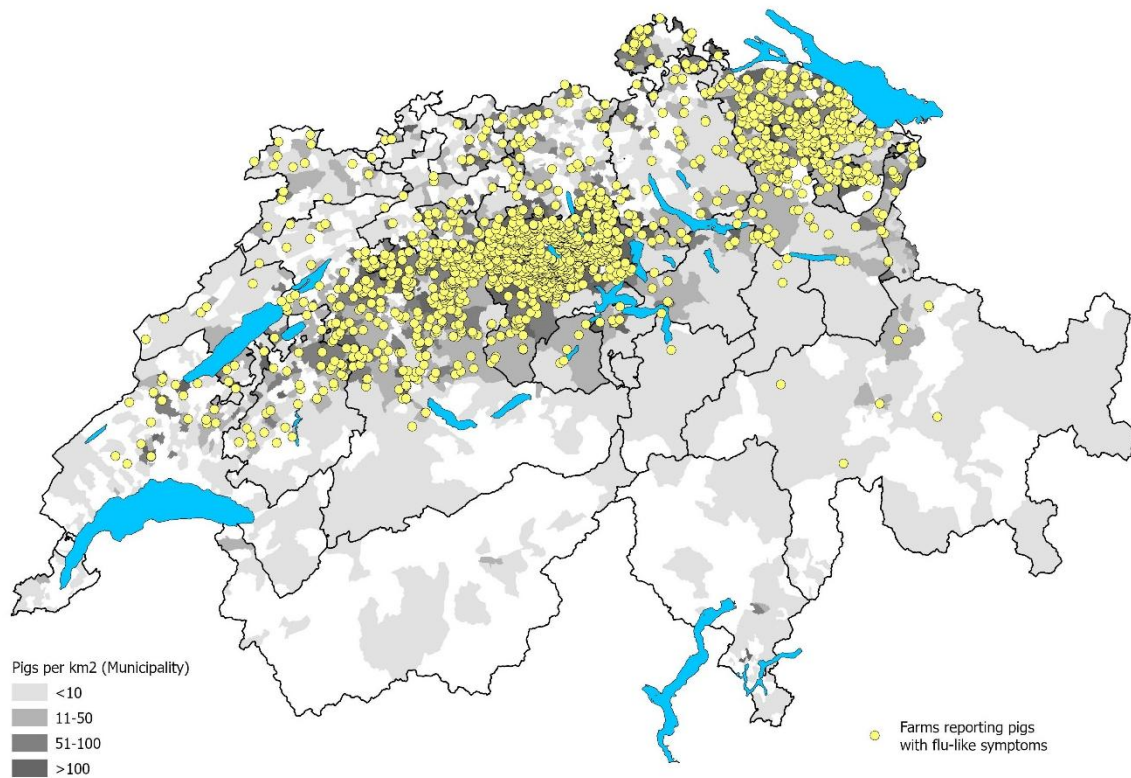

400

401 Figure 4: Regional distribution of farms reporting influenza-like signs in pigs from 2009 – 2022  
402 (M. Binggeli, FSVO, 2023).

403

404 The proportion of farms sampled after reporting of influenza-like signs ranged from 20 – 47%

405 (Fig. 5). On average 31% of farms were sampled per year. In total, 674 program-related farm

406 visits took place between 2010 and 2022, in which 1660 porcine nasal swab samples were

407 collected. In the laboratory, 145 pooled nasal swabs and 1515 unpoolled nasal swabs were  
408 analyzed. In addition, in 107 cases lung material was analyzed. The percentage of farm visits  
409 (total n = 674) with positive IAV testing ranged between 32% and 70% (Fig. 5) and was highest  
410 in the last quarter of the year (Fig. 6). IAV was detected in a total of 375 (= 56%) farm visits.  
411 The IAV detection rate was 44.94% (n = 746) in the nasal swab samples and 25.23% (n = 27) in  
412 the lung samples.

413

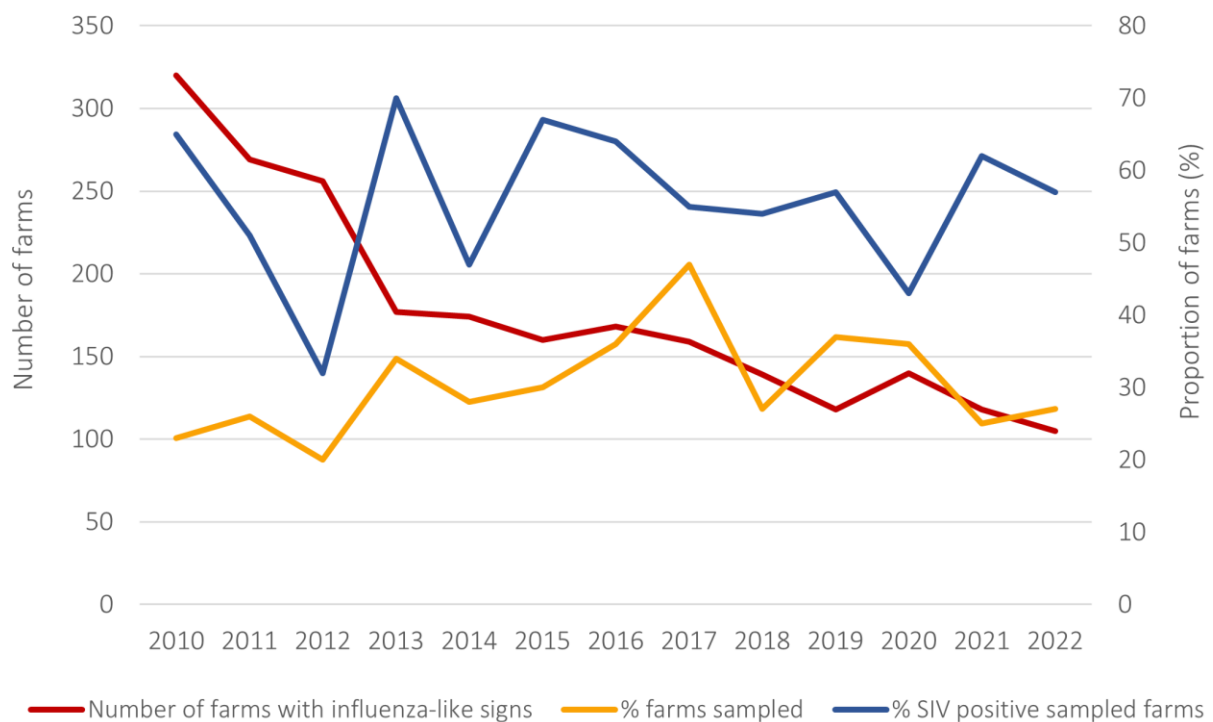

414

415 Figure 5: Number of farms reporting pigs with influenza-like signs (red line), proportion of farm  
416 visits with sampling (orange line) and proportion of sampled farms testing IAV positive (blue  
417 line) between 2010 and 2022.

418

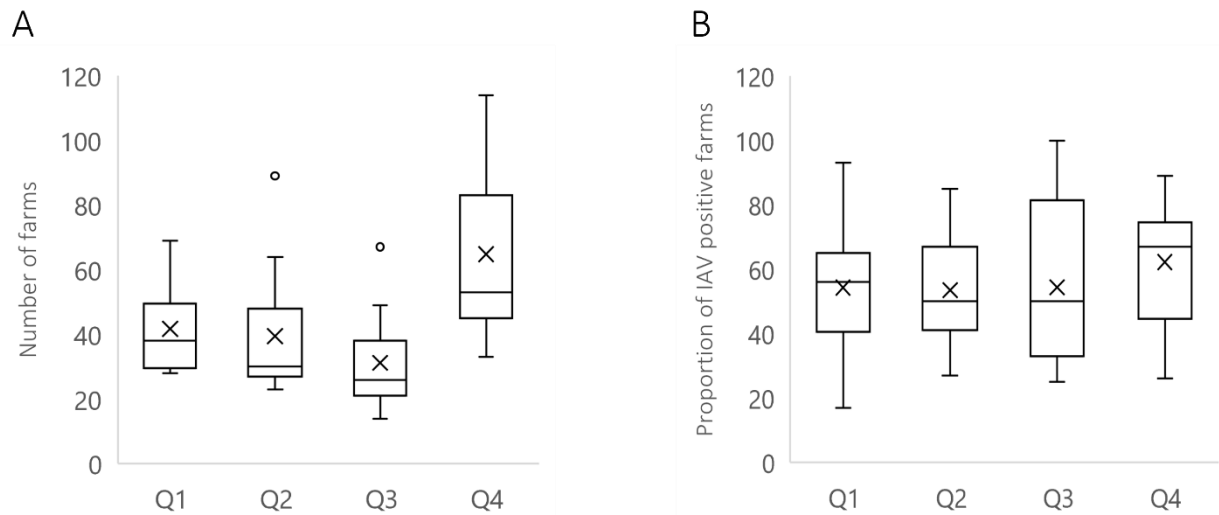

419

420 Figure 6: Number of farms reporting pigs with influenza-like signs (A), and percent of farm

421 visits with IAV positive result by quarter (Q1 – Q4) (B) between 2010 and 2022. The X in each

422 box corresponds to the mean value.

423

424 According to subtyping RT-PCR, none of the SIV positive samples could be assigned to H3N2

425 or H1N2 strains. Influenza A(H1N1)pdm09 was detected by specific real-time RT-PCR in four

426 nasal swab samples in 2011 and three nasal swab samples in 2013. For one of these samples

427 (SIV\_75\_13\_H1) a Sanger sequence was obtained, confirming its type (Fig. 7). In the 375 IAV

428 positive farm visits, the H1N1 subtype was detected on 196 occasions by subtyping RT-PCR and

429 Sanger sequencing. In approximately 40 farm visits only H1, in approximately 80 farm visits

430 only N1 and in approximately 60 farm visits no subtype was identified.

431 A total of 309 influenza sequences from PCR-amplified regions from pigs and humans were

432 obtained after Sanger sequencing: 125 sequences from the HA segment and 184 from the NA

433 segment. The HA sequences could be assigned to clades C.2.1 and C.2.2. The only exception is

434 the one sample (SIV\_75\_13\_H1) from 2013 mentioned above, which belongs to HA clade

435 A.3.3.2 (Fig.7 and 9). Although clades C.2.1 and C.2.2 are also present in various European

436 countries, the Swiss samples form distinct clusters that differ from strains in neighboring



437 countries. This distinction is observed in both the HA segment (Fig. 7) and the NA segment (Fig.  
 438 8).

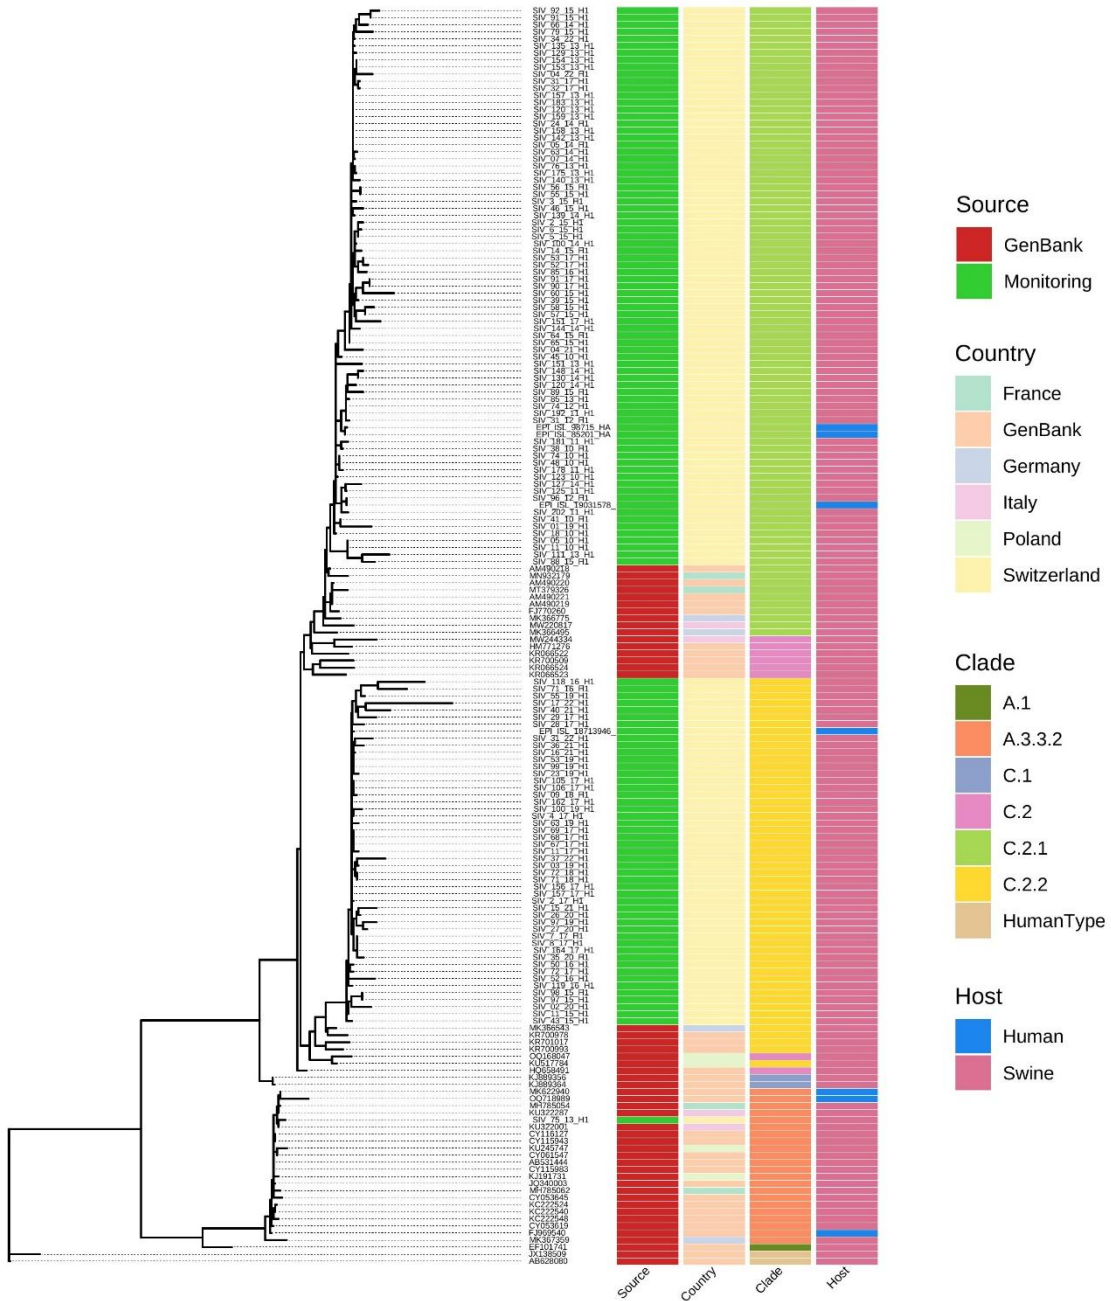

439  
 440 Figure 7: Maximum likelihood tree of the PCR-amplified region of the HA gene (approx. 450nt).  
 441 The sequences obtained in the course of the Swiss national SIV monitoring program were  
 442 labeled with 'SIV\_number\_year'. Sequences were characterized by country of origin, HA clade  
 443 and host.



444

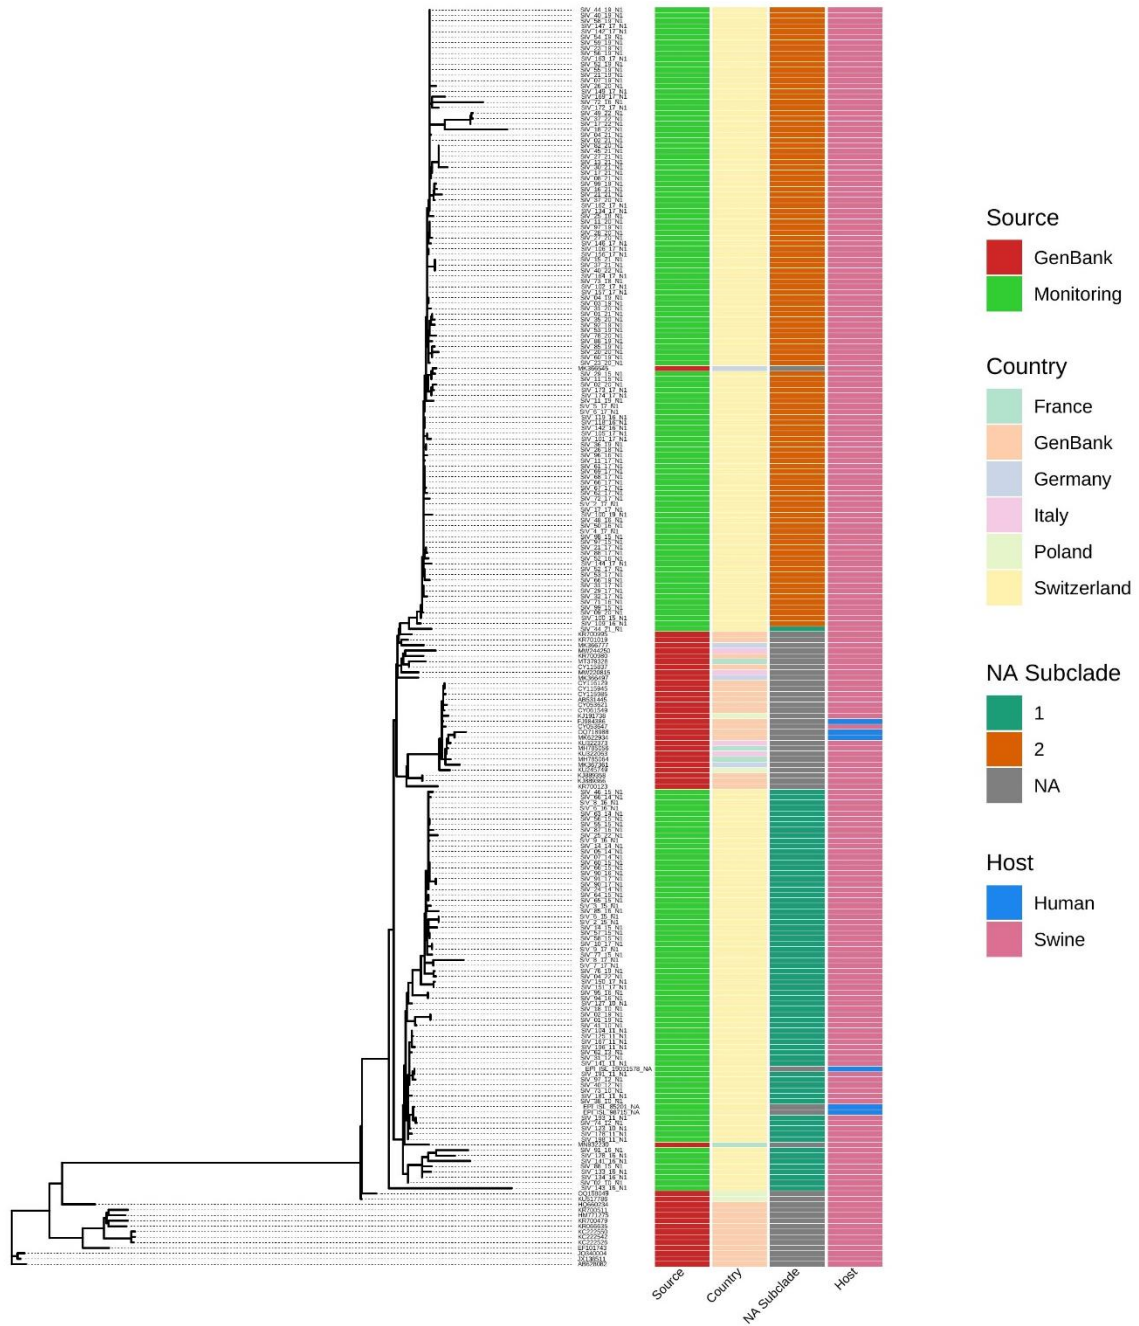

445

446 Figure 8: Maximum likelihood tree of the PCR-amplified region of the NA gene (approx. 450nt).

447 The sequences obtained in the course of the Swiss national SIV monitoring program were

448 labeled with 'SIV\_number\_year'. Sequences were characterized by country of origin, NA

449 subclade and host.

450

451 Given the long-term nature of the national surveillance program, the temporal dynamics of the  
 452 prevalence of SIV genotypes can be assessed (Fig. 9). The beginning of the program was  
 453 characterized by the predominance of C.2.1 genotypes. Starting from 2015, the occurrence of  
 454 this clade narrows, and the clade is superseded by clade C.2.2, however, without fully  
 455 disappearing. By sequencing both HA and NA segments, potential reassortments could be  
 456 investigated. Sequences for both segments were available for 78 samples (75 porcine samples, 3  
 457 human samples). Since canonical SIV subtyping into clades is typically performed on the HA  
 458 gene sequence only, a custom method was developed to categorize the circulating NA genotypes  
 459 in Switzerland. Similar to previous observations in the HA segment, the Swiss NA sequences  
 460 also form two distinct clusters, here referred to as subclade 1 and subclade 2 (Fig. 8,  
 461 Supplementary Fig. 1). Interestingly, NA subclade 1 tends to be combined with HA clade C.2.1,  
 462 while subclade 2 is typically associated with C.2.2. However, six possible reassortments were  
 463 identified (Fig. 9), in which a clade C.2.1 HA was combined with a subclade 2 NA and a clade  
 464 C.2.2 HA with a subclade 1 NA.

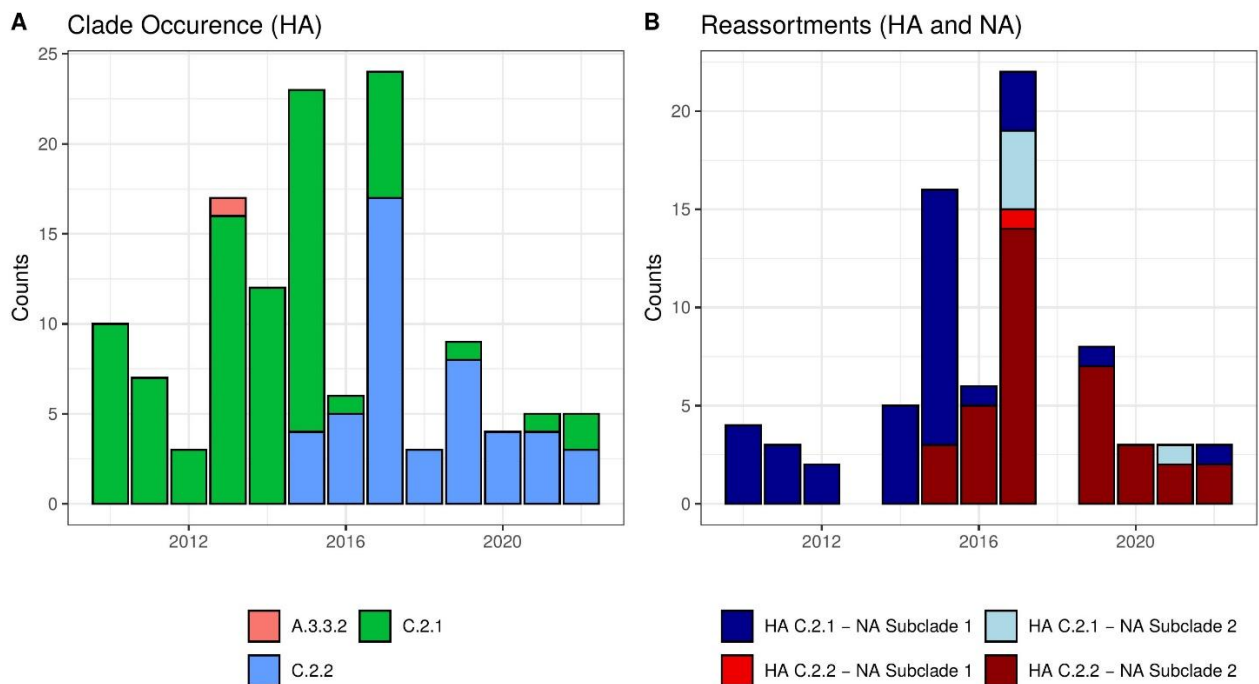

465

466 Figure 9: A) Temporal HA clade predominance of Swiss SIV strains from 2010 – 2022. B)

467 Temporal overview of HA clade and NA subclade combinations with possible reassortments of  
468 Swiss SIV strains.

469

## 470 **Human samples**

471 Between 2010 and 2022, in association with project-related farm visits (n = 674), a total of 150  
472 humans on 118 farms reported influenza-like symptoms within ten days prior to the visit (Fig.  
473 10) (FSVO, 2023). In 64 cases the onset of clinical symptoms was reported 1 – 3 days, in 86  
474 cases 4 – 10 days before the farm visit. On average, 33% of humans with reported influenza-like  
475 symptoms were sampled per year. Over the years, the number of in-contact humans reporting  
476 symptoms has decreased from 22 in 2010 to 9 in 2022. In 455 project-related farm visits there  
477 were no reports of humans showing influenza-like symptoms in the 10 days prior to the farm  
478 visit, and in 103 visits, no information concerning illness in humans was available (FSVO,  
479 2023).

480 Sixty-one individuals sent a self-collected nasal or nasopharyngeal swab to the NRCI (Fig. 10).  
481 Of these, 29 persons reported symptom onset 1 – 3 days, 10 persons 4 – 10 days, and six persons  
482 more than 10 days prior to the farm visit. In 16 cases no information on symptom onset was  
483 available. The most common symptoms reported were cough (60.6%), headache (36.1%),  
484 myalgia (27.9%), body temperature > 38°C, and rhinitis (18%).

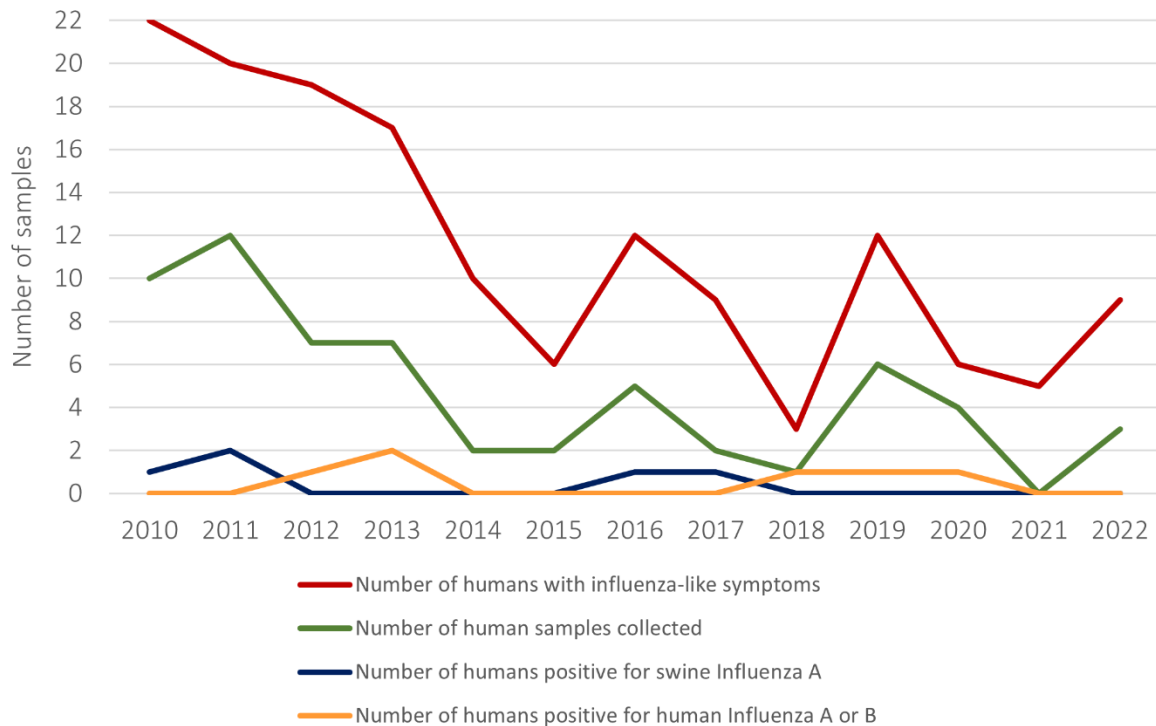

485  
 486 Figure 10: Number of humans reporting influenza-like symptoms in the context of the Swiss  
 487 national SIV monitoring program (red line, n = 150), number of human samples collected (green  
 488 line, n = 61), number of human samples positive for human Influenza A or B (orange line, n = 6)  
 489 and number of human samples positive for SIV (blue line, n = 5) between 2010 and 2022.  
 490  
 491 Among the 61 sampled individuals, eleven tested positive for influenza virus. Three were  
 492 positive for human influenza A (two A(H1N1)pdm09 and one A which could not be further  
 493 characterized) and three for influenza B (two Yamagata and one Victoria) (Tab. 1). Five  
 494 individuals were found positive for SIV (Tab. 2). Sequence analysis for HA and NA was  
 495 successful in 4 and 3 cases, respectively, assigning the zoonotic viruses to the Eurasian avian  
 496 lineage (clade HA-1C) (Fig. 7 and 8; Tab. 2).

| Date of collection | Symptom onset before sampling | Symptoms reported           | Influenza Type |
|--------------------|-------------------------------|-----------------------------|----------------|
| Dec 2012           | 1 – 3 days                    | Cough, headache, bronchitis | A(H1N1)pdm09   |

|          |             |                                  |              |
|----------|-------------|----------------------------------|--------------|
| Feb 2013 | 4 – 10 days | Headache, myalgia                | A            |
| Mar 2013 | 1 – 3 days  | Fever, cough, headache, rhinitis | B Yamagata   |
| Feb 2018 | 1 – 3 days  | Fever, cough, headache, myalgia  | B Yamagata   |
| Apr 2019 | 4 – 10 days | Cough, headache, myalgia         | A(H1N1)pdm09 |
| Jan 2020 | 4 – 10 days | Not reported                     | B Victoria   |

497 Table 1: Human samples positive for human influenza A (IAV) and B virus (IBV).

498

| Sample collection | Symptoms                             | GISAID Accession | HA Clade | GenBank Accession HA | GenBank Accession NA |
|-------------------|--------------------------------------|------------------|----------|----------------------|----------------------|
| Oct 2010          | Fever, myalgia, rhinitis             | EPI_ISL_85201    | C.2.1    | PQ663335             | PQ663568             |
| Apr 2011          | Cough, rhinitis                      | EPI_ISL_98715    | C.2.1    | PQ663336             | PQ663567             |
| Nov 2011          | Cough, rhinitis                      | EPI_ISL_19031578 | C.2.1    | PQ663346             | PQ663573             |
| Dec 2016          | Cough                                | EPI_ISL_242993   | n.d.     |                      |                      |
| Dec 2017          | Cough, headache, myalgia, bronchitis | EPI_ISL_18713946 | C.2.2    | PQ663389             |                      |

499 Table 2: Human samples positive for SIV. GISAID = Global Initiative on Sharing All Influenza

500 Data; HA = hemagglutinin; NA = neuraminidase; n.d. = not determinable.

## 501 Discussion

502 In the course of the Swiss national SIV monitoring program, reports of influenza-like signs in  
503 pigs and the detection of SIV in the respective farms occurred throughout the year, tending to be  
504 somewhat more frequent in the cold months. Nevertheless, as reported elsewhere, no seasonality  
505 of SIV can be inferred from these data (Fig. 6) (Anderson et al., 2021; Pippig et al., 2016;  
506 Vincent et al., 2020).

507 To date, three main subtypes (H1N1, H1N2, H3N2) including three major H1 lineages of SIV  
508 circulate in pigs in Europe which are distinct from their counterparts in North America and Asia  
509 (Anderson et al., 2016; Anderson et al., 2021; Bourret, 2018; Chiapponi et al., 2021; de Jong et  
510 al., 2007; Kessler et al., 2021; Kuntz-Simon and Madec, 2009; Lewis et al., 2016; Pippig et al.,  
511 2016; Vincent et al., 2020):

- 512 – The Eurasian avian lineage (H1avN1, clade HA-1C), which was transmitted from wild ducks  
513 to pigs and appeared in 1979
- 514 – The human-like H3N2 lineage, originating from the reassortment of human-like swine H3N2  
515 and a H1avN1 in 1984
- 516 – The human seasonal lineage (H1huN2, clade HA-1B), which appeared in 1994 after  
517 reassortment of a human-like H3N2 and a seasonal human H1N1
- 518 – The classical swine lineage (H1N1pdm09, clade HA-1A), which circulates in the swine  
519 population since 2009, and is hypothesized to have arisen upon reassortment of H1avN1 and  
520 the North American triple reassortant H3N2

521 On farm level, H1avN1 is the dominant subtype in Europe, followed by other reassortant strains  
522 of H1N1 (including H1N1pdm09) and H1N2 subtypes, and H3N2 strains (Chiapponi et al.,  
523 2021).

524 In the present study, according to subtyping PCR none of the SIV positive samples could be  
525 assigned to H3N2 or H1N2 strains, making H1N1 the only subtype detected so far in the Swiss

526 pig population (FSVO, 2023). In a small number of SIV positive samples, we found evidence for  
527 reverse zoonosis in the Swiss pig population: Influenza A(H1N1)pdm09 (HA-1A) was detected  
528 in a total of seven pig samples by specific real-time RT-PCR, i.e. four in 2011 and three in 2013.  
529 This virus emerged as a result of viral reassortment between two influenza lineages that had been  
530 circulating in pigs for years, i.e. a triple-reassortant circulating in North America and the  
531 Eurasian avian-like lineage (Smith et al., 2009). It was first detected in humans at the North  
532 American-Mexican border in March and April 2009 and, having acquired the ability for efficient  
533 human-to-human transmission, was declared a pandemic by the World Health Organization  
534 (WHO) by June 2009. By July the virus was reported from 122 countries (Kessler et al., 2021;  
535 Saunders-Hastings and Krewski, 2016) including Switzerland, where the first human case was  
536 detected in April 2009. It rapidly became the predominant IAV variant circulating in humans,  
537 with death rates fortunately remaining low (Thomas and Kaiser, 2010). From humans, the virus  
538 made its way back into pigs via reverse zoonosis (Rajao et al., 2019; Saunders-Hastings and  
539 Krewski, 2016), which is also the presumed route of transmission in the here described seven  
540 Swiss pig cases. Whereas formerly circulating human H1N1 strains were completely replaced by  
541 the pandemic variant, co-circulation of the pandemic strain with endemic viruses was observed  
542 in the pig population. However, at farm level H1avN1 (clade HA-1C) remained the predominant  
543 subtype in European pigs (Chiapponi et al., 2021; Pippig et al., 2016; Thomas and Kaiser, 2010;  
544 Zell et al., 2020).

545 With the exception of the seven A(H1N1)pdm09 (HA-1A) positive samples as per specific real-  
546 time RT-PCR, all HA and NA RNA segments sequenced in the present study could be assigned  
547 to the Eurasian avian lineage (HA-1C), which is widespread in pigs in Europe (Anderson et al.,  
548 2016). According to H1 and N1 sequence alignments, the Swiss H1N1 strains cluster into two  
549 HA clades, i.e. C.2.1 and C.2.2. Since 2015, the HA typing has shown a gradual shift from clade  
550 C.2.1 to C.2.2 (Fig. 9). However, C.2.1 sequences are still detected. Despite their evolutive  
551 capacities, phylogenetic analyses indicate that compared to other countries there is little genetic



552 diversity and that the genome composition of influenza viruses in Swiss pigs remained fairly  
553 stable over the years (Fig. 7 – 9). Only six reassortments between H1 clades and N1 subclades  
554 were identified (Fig. 9). The absence of H1N2 and H3N2 subtypes, which are circulating in the  
555 rest of Europe, and the comparatively low diversity of H1N1 strains can be at least partly  
556 attributed to the Swiss pig production system, which is inherently isolated, influenced by low  
557 animal import levels and subject to strict biosecurity measures (Chiapponi et al., 2021; Lewis et  
558 al., 2016). Similar specific genetic clusters were observed for other viruses in Swiss pigs such as  
559 hepatitis E virus (Vonlanthen-Specker et al., 2021) and atypical porcine pestivirus (Kaufmann et  
560 al., 2019).

561 We also found evidence for spillover of influenza virus from pigs to humans: among the 11  
562 influenza virus positive swabs of in-contact humans, six tested positive for human strains and  
563 five (= 45%) tested positive for SIV (Tab. 1 and 2). Sequence analyses assigned the SIVs to the  
564 Eurasian avian lineage of H1N1 and to the HA clade which at that time was most frequently  
565 detected in the pigs, i.e. C.2.1 and C.2.2 (Fig. 7 and 9). Given that the five individuals also had  
566 symptoms typical for influenza (Tab. 2), it is highly likely that pigs were the source of infection.  
567 Antibody testing of convalescent sera would have permitted more conclusive information but  
568 was not performed. Since the first well-documented reports in 1958 and 1974, human infections  
569 with SIVs (both H1N1 and H3N2) have continued to be reported sporadically worldwide.  
570 Usually, these infections caused only mild disease resembling human seasonal influenza  
571 (Anderson et al., 2021; Freidl et al., 2014; Gregory et al., 2003; Kuntz-Simon and Madec, 2009;  
572 Rambo-Martin et al., 2020). Sustained human-to-human transmission rarely followed and has  
573 not been observed in the present study either. Compared to the number of people directly or  
574 indirectly involved in pig production, the number of SIV infections detected in humans is low.  
575 Yet, considering that in the frame of the Swiss national SIV program 45% of influenza positive  
576 human cases tested positive for SIV and that SIV infections are indistinguishable from seasonal  
577 human influenza, a high number of undetected cases must be expected. This hypothesis is

578 supported by seroepidemiological studies in which higher seroprevalences of SIV were found in  
579 pig farmers and butchers than in people without occupational contacts to pigs (Borkenhagen et  
580 al., 2020; Krumbholz et al., 2014; Sun et al., 2020).

581 It is undisputed that national and international monitoring programs in animals and humans with  
582 internationally coordinated early warning systems constitute an important pillar in the  
583 surveillance of influenza viruses worldwide. However, after more than 15 years since its launch,  
584 the Swiss national monitoring program for SIV has brought to light various difficulties and  
585 hurdles that need to be addressed in the future: (1) The number of farms reporting pigs with  
586 influenza-like signs has continuously decreased from 320 in 2010 to 105 in 2022 (Fig. 5) FSVO,  
587 2023). Likewise, the number of in-contact humans reporting influenza-like symptoms has  
588 decreased from 22 to 9 over the same period (Fig. 10). In 103 cases, no information concerning  
589 illness in humans was available. These reduced numbers most likely do not reflect a decrease in  
590 infections but rather a decline in disease awareness after the 2009 pandemic. In addition, due to  
591 the endemic circulation of SIVs and the resulting herd immunity, severe symptoms associated  
592 with a high viral load are probably rather rare and mainly seen in co-infections with other  
593 pathogens. For the future, all stakeholders including the farmers, veterinarians, meat producers  
594 and veterinary authorities should take measures to increase disease awareness. (2) After  
595 notification of influenza-like symptoms, the rate of farms and individuals sampled remained at a  
596 more or less constant low level of approximately 30%. Well-orchestrated reporting,  
597 communication and cooperation between stakeholders is required in order to consistently sample  
598 pigs on reported farms. (3) In the IAV-positive farm visits, the rate of samples in which both HA  
599 and NA were successfully subtyped was rather low ( $196/375 = 52\%$ ). In approximately 11%  
600 only H1, in 21% only N1 and in 16% of cases no subtype was identified. For a large proportion  
601 of IAV positive samples, including human swabs, the Ct value after IAV real-time RT-PCR was  
602 rather high, making successful subtyping and sequencing more difficult. High Ct values can  
603 result from various causes: low viral loads in the sample material, suboptimal sampling, poor

604 sample quality due to contamination with dirt and bacteria, improper sample handling and/or  
605 storage, or low-performing assays. In many cases, the clinical signs may only be recognized late,  
606 or the nasal swabs may be taken late in the infection cycle, i.e. at a time when maximum virus  
607 excretion is already over and virus clearance almost complete. Efficient SIV surveillance  
608 programs depend on sensitive and specific diagnostic methods which allow for cost-effective  
609 large-scale analysis. To detect circulating strains and new variants, currently several PCR assays  
610 are needed, which make the process expensive and time-consuming. Novel methods for high-  
611 throughput whole genome sequencing such as Illumina or Nanopore technologies, which have  
612 been extensively developed in recent years and have become more sensitive and affordable,  
613 could improve the surveillance of SIV and reduce the cost of virus subtyping in the long term  
614 (Goecke et al., 2018; Rambo-Martin et al., 2020). From a laboratory perspective, a future main  
615 goal of the Swiss national surveillance program is the implementation of a SIV MinION  
616 Nanopore sequencing protocol (King et al., 2020), that in parallel to the established Illumina  
617 whole-genome sequencing protocol (Kubacki et al., 2021) allows for cost-efficient untargeted  
618 sequencing of all influenza virus genome segments present in a sample.

619

## 620 **Acknowledgements**

621 We would like to express our sincere appreciation to the farmers and veterinarians participating  
622 in the national SIV surveillance program. They are the key players in the success of the program  
623 and their collaboration makes an important contribution to tracking influenza virus evolution in  
624 Switzerland.

625 Many thanks to M. Binggeli (FSVO) for providing the geographical distribution on farms  
626 reporting coughing pigs.

627 **Funding**

628 The national monitoring program for SIV is funded by the Federal Food Safety and Veterinary  
629 Office (FSVO) and the Federal Office for Public Health (FOPH).

630

631 **Conflict of interest**

632 The authors declare no conflict of interest.

## 633 **References**

- 634
- 635 1. Abdelwhab EM, Mettenleiter TC. 2023. Zoonotic animal influenza virus and potential  
636 mixing vessel hosts. *Viruses* 15.
- 637
- 638 2. Altschul SF, Gish W, Miller W, Myers EW, Lipman DJ. 1990. Basic local alignment search  
639 tool. *J Mol Biol* 215:403-10.
- 640
- 641 3. Anderson TK, Chang J, Arendsee ZW, Venkatesh D, Souza CK, Kimble JB, Lewis NS,  
642 Davis CT, Vincent AL. 2021. Swine influenza A viruses and the tangled relationship with  
643 humans. *Cold Spring Harb Perspect Med* 11.
- 644
- 645 4. Anderson TK, Macken CA, Lewis NS, Scheuermann RH, Van Reeth K, Brown IH, Swenson  
646 SL, Simon G, Saito T, Berhane Y, Ciacci-Zanella J, Pereda A, Davis CT, Donis RO, Webby  
647 RJ, Vincent AL. 2016. A phylogeny-based global nomenclature system and automated  
648 annotation tool for H1 hemagglutinin genes from swine influenza A viruses. *mSphere* 1.
- 649
- 650 5. Borkenhagen LK, Wang GL, Simmons RA, Bi ZQ, Lu B, Wang XJ, Wang CX, Chen SH,  
651 Song SX, Li M, Zhao T, Wu MN, Park LP, Cao WC, Ma MJ, Gray GC. 2020. High risk of  
652 influenza virus infection among swine workers: examining a dynamic cohort in China. *Clin*  
653 *Infect Dis* 71:622-629.
- 654
- 655 6. Bourret V. 2018. Avian influenza viruses in pigs: an overview. *Vet J* 239:7-14.
- 656
- 657 7. Campitelli E. 2020. ggnewscale: Multiple fill and colour scales in 'ggplot2'. R package  
658 version 0.4 1. doi: 10.5281/zenodo.2543762.

- 659
- 660 8. CDC. 2007. CDC Realtime RTPCR (rRTPCR) Protocol for Detection and Characterization  
661 of Influenza.  
662
- 663 9. Chiapponi C, Fallacara F., Foni E. Subtyping of H1N1, H1N2 and H3N2 swine influenza  
664 viruses by two multiplex RT-PCR. Proceedings of the 4th international symposium on  
665 emerging and re-emerging pig diseases, Rome 29th June - 2nd July, 2003  
666
- 667 10. Chiapponi C, Prosperi A, Moreno A, Baioni L, Faccini S, Manfredi R, Zanni I, Gabbi V,  
668 Calanchi I, Fusaro A, Beato MS, Cavicchio L, Torreggiani C, Alborali GL, Luppi A. 2021.  
669 Genetic variability among swine influenza viruses in Italy: data analysis of the period 2017-  
670 2020. *Viruses* 14.  
671
- 672 11. de Graaf M, Fouchier RA. 2014. Role of receptor binding specificity in influenza A virus  
673 transmission and pathogenesis. *EMBO J* 33:823-41.  
674
- 675 12. de Jong JC, Smith DJ, Lapedes AS, Donatelli I, Campitelli L, Barigazzi G, Van Reeth K,  
676 Jones TC, Rimmelzwaan GF, Osterhaus AD, Fouchier RA. 2007. Antigenic and genetic  
677 evolution of swine influenza A (H3N2) viruses in Europe. *J Virol* 81:4315-22.  
678
- 679 13. Deorowicz S, Debudaj-Grabysz A, Gudyś A. 2016. FAMSA: Fast and accurate multiple  
680 sequence alignment of huge protein families. *Sci Rep* 6:33964.  
681
- 682 14. Eisfeld AJ, Biswas A, Guan L, Gu C, Maemura T, Trifkovic S, Wang T, Babujee L, Dahn  
683 R, Halfmann PJ, Barnhardt T, Neumann G, Suzuki Y, Thompson A, Swinford AK, Dimitrov  
684 KM, Poulsen K, Kawaoka Y. 2024. Pathogenicity and transmissibility of bovine H5N1

685 influenza virus. *Nature* 633:426-432.

686

687 15. Freidl GS, Meijer A, de Bruin E, de Nardi M, Munoz O, Capua I, Breed AC, Harris K, Hill  
688 A, Kosmider R, Banks J, von Dobschuetz S, Stark K, Wieland B, Stevens K, van der Werf S,  
689 Enouf V, van der Meulen K, Van Reeth K, Dauphin G, Koopmans M, Consortium F. 2014.

690 Influenza at the animal-human interface: a review of the literature for virological evidence of  
691 human infection with swine or avian influenza viruses other than A(H5N1). *Euro Surveill* 19.

692

693 16. FSVO. 2023. Influenza surveillance in humans and pigs.

694 [https://www.blv.admin.ch/dam/blv/en/dokumente/tiere/tierkrankheiten-und-](https://www.blv.admin.ch/dam/blv/en/dokumente/tiere/tierkrankheiten-und-arzneimittel/praevention/bericht-schweineinfluenza-bei-schwein-mensch-2022.pdf.download.pdf/SIV%20Jahresbericht%202022_final.pdf)  
695 [arzneimittel/praevention/bericht-schweineinfluenza-bei-schwein-mensch-](https://www.blv.admin.ch/dam/blv/en/dokumente/tiere/tierkrankheiten-und-arzneimittel/praevention/bericht-schweineinfluenza-bei-schwein-mensch-2022.pdf.download.pdf/SIV%20Jahresbericht%202022_final.pdf)  
696 [2022.pdf.download.pdf/SIV%20Jahresbericht%202022\\_final.pdf](https://www.blv.admin.ch/dam/blv/en/dokumente/tiere/tierkrankheiten-und-arzneimittel/praevention/bericht-schweineinfluenza-bei-schwein-mensch-2022.pdf.download.pdf/SIV%20Jahresbericht%202022_final.pdf)

697

698 17. Goecke NB, Krog JS, Hjulsager CK, Skovgaard K, Harder TC, Breum S, Larsen LE. 2018.

699 Subtyping of swine influenza viruses using a high-throughput real-time PCR platform. *Front*  
700 *Cell Infect Microbiol* 8:165.

701

702 18. Gregory V, Bennett M, Thomas Y, Kaiser L, Wunderli W, Matter H, Hay A, Lin YP. 2003.

703 Human infection by a swine influenza A (H1N1) virus in Switzerland. *Arch Virol* 148:793-  
704 802.

705

706 19. Henritzi D, Zhao N, Starick E, Simon G, Krog JS, Larsen LE, Reid SM, Brown IH,

707 Chiapponi C, Foni E, Wacheck S, Schmid P, Beer M, Hoffmann B, Harder TC. 2016. Rapid  
708 detection and subtyping of European swine influenza viruses in porcine clinical samples by

709 haemagglutinin- and neuraminidase-specific tetra- and triplex real-time RT-PCRs. *Influenza*  
710 *Other Respir Viruses* 10:504-517.



- 711
- 712 20. Hoffmann E, Stech J, Guan Y, Webster RG, Perez DR. 2001. Universal primer set for the  
713 full-length amplification of all influenza A viruses. *Arch Virol* 146:2275-89.
- 714
- 715 21. Karakus U, Mena I, Kottur J, El Zahed SS, Seoane R, Yildiz S, Chen L, Plancarte M,  
716 Lindsay L, Halpin R, Stockwell TB, Wentworth DE, Boons GJ, Krammer F, Stertz S, Boyce  
717 W, de Vries RP, Aggarwal AK, García-Sastre A. 2024. H19 influenza A virus exhibits  
718 species-specific MHC class II receptor usage. *Cell Host Microbe* 32:1089-1102.e10.
- 719
- 720 22. Katoh K, Misawa K, Kuma K, Miyata T. 2002. MAFFT: a novel method for rapid multiple  
721 sequence alignment based on fast Fourier transform. *Nucleic Acids Res* 30:3059-66.
- 722
- 723 23. Kaufmann C, Stalder H, Sidler X, Renzullo S, Gurtner C, Grahofler A, Schweizer M. 2019.  
724 Long-term circulation of atypical porcine pestivirus (APPV) within Switzerland. *Viruses* 11.
- 725
- 726 24. Kessler S, Harder TC, Schwemmler M, Ciminski K. 2021. Influenza A viruses and zoonotic  
727 events - are we creating our own reservoirs? *Viruses* 13.
- 728
- 729 25. King J, Harder T, Beer M, Pohlmann A. 2020. Rapid multiplex MinION nanopore  
730 sequencing workflow for Influenza A viruses. *BMC Infect Dis* 20:648.
- 731
- 732 26. Krammer F, Smith GJD, Fouchier RAM, Peiris M, Kedzierska K, Doherty PC, Palese P,  
733 Shaw ML, Treanor J, Webster RG, García-Sastre A. 2018. Influenza. *Nat Rev Dis Primers*  
734 4:3.
- 735

- 736 27. Krumbholz A, Lange J, Dürrwald R, Walther M, Müller TH, Kühnel D, Wutzler P, Sauerbrei  
737 A, Zell R. 2014. Prevalence of antibodies to European porcine influenza viruses in humans  
738 living in high pig density areas of Germany. *Med Microbiol Immunol* 203:13-24.  
739
- 740 28. Kubacki J, Fraefel C, Bachofen C. 2021. Implementation of next-generation sequencing for  
741 virus identification in veterinary diagnostic laboratories. *J Vet Diagn Invest* 33:235-247.  
742
- 743 29. Kuchipudi SV, Nelli RK, Gontu A, Satyakumar R, Surendran Nair M, Subbiah M. 2021.  
744 Sialic acid receptors: the key to solving the enigma of zoonotic virus spillover. *Viruses* 13.  
745
- 746 30. Kuntz-Simon G, Madec F. 2009. Genetic and antigenic evolution of swine influenza viruses  
747 in Europe and evaluation of their zoonotic potential. *Zoonoses Public Health* 56:310-25.  
748
- 749 31. Lewis NS, Russell CA, Langat P, Anderson TK, Berger K, Bielejec F, Burke DF, Dudas G,  
750 Fonville JM, Fouchier RA, Kellam P, Koel BF, Lemey P, Nguyen T, Nuansrichy B, Peiris  
751 JM, Saito T, Simon G, Skepner E, Takemae N, Webby RJ, Van Reeth K, Brookes SM,  
752 Larsen L, Watson SJ, Brown IH, Vincent AL, consortium E. 2016. The global antigenic  
753 diversity of swine influenza A viruses. *Elife* 5:e12217.  
754
- 755 32. Liu M, van Kuppeveld FJ, de Haan CA, de Vries E. 2023. Gradual adaptation of animal  
756 influenza A viruses to human-type sialic acid receptors. *Curr Opin Virol* 60:101314.  
757
- 758 33. Long JS, Mistry B, Haslam SM, Barclay WS. 2019. Host and viral determinants of influenza  
759 A virus species specificity. *Nat Rev Microbiol* 17:67-81.  
760

- 761 34. Ma W. 2020. Swine influenza virus: current status and challenge. *Virus Res* 288:198118.  
762
- 763 35. Myers KP, Olsen CW, Gray GC. 2007. Cases of swine influenza in humans: a review of the  
764 literature. *Clin Infect Dis* 44:1084-8.  
765
- 766 36. Nguyen XD, Zhao Y, Lin J, Purswell JL, Tabler T, Voy B, Hawkins S, Evans JD. 2023.  
767 Modeling long-distance airborne transmission of highly pathogenic avian influenza carried  
768 by dust particles. *Sci Rep* 13:16255.  
769
- 770 37. Paradis E, Claude J, Strimmer K. 2004. APE: Analyses of phylogenetics and evolution in R  
771 language. *Bioinformatics* 20:289-90.  
772
- 773 38. Pippig J, Ritzmann M, Büttner M, Neubauer-Juric A. 2016. Influenza A viruses detected in  
774 swine in southern Germany after the H1N1 pandemic in 2009. *Zoonoses Public Health*  
775 63:555-568.  
776
- 777 39. Price MN, Dehal PS, Arkin AP. 2010. FastTree 2--approximately maximum-likelihood trees  
778 for large alignments. *PLoS One* 5:e9490.  
779
- 780 40. Rajao DS, Vincent AL, Perez DR. 2019. Adaptation of human influenza viruses to swine.  
781 *Front Vet Sci* 5:347.  
782
- 783 41. Rambo-Martin BL, Keller MW, Wilson MM, Nolting JM, Anderson TK, Vincent AL, Bagal  
784 UR, Jang Y, Neuhaus EB, Davis CT, Bowman AS, Wentworth DE, Barnes JR. 2020.  
785 Influenza A virus field surveillance at a swine-human interface. *mSphere* 5.  
786

- 787 42. Rausch T, Fritz MH, Untergasser A, Benes V. 2020. Tracy: basecalling, alignment, assembly  
788 and deconvolution of Sanger chromatogram trace files. *BMC Genomics* 21:230.  
789
- 790 43. Saunders-Hastings PR, Krewski D. 2016. Reviewing the history of pandemic influenza:  
791 understanding patterns of emergence and transmission. *Pathogens* 5.  
792
- 793 44. R Core Team. 2013. R: a language and environment for statistical computing. Foundation for  
794 Statistical Computing, Vienna, Austria.  
795
- 796 45. Schulze M, Nitsche A, Schweiger B, Biere B. 2010. Diagnostic approach for the  
797 differentiation of the pandemic influenza A(H1N1)v virus from recent human influenza  
798 viruses by real-time PCR. *PLoS One* 5:e9966.  
799
- 800 46. Schweiger B, Zadow I, Heckler R, Timm H, Pauli G. 2000. Application of a fluorogenic  
801 PCR assay for typing and subtyping of influenza viruses in respiratory samples. *J Clin*  
802 *Microbiol* 38:1552-8.  
803
- 804 47. Shu Y, McCauley J. 2017. GISAID: Global initiative on sharing all influenza data - from  
805 vision to reality. *Euro Surveill* 22.  
806
- 807 48. Smith GJ, Vijaykrishna D, Bahl J, Lycett SJ, Worobey M, Pybus OG, Ma SK, Cheung CL,  
808 Raghwani J, Bhatt S, Peiris JS, Guan Y, Rambaut A. 2009. Origins and evolutionary  
809 genomics of the 2009 swine-origin H1N1 influenza A epidemic. *Nature* 459:1122-5.  
810
- 811 49. Spackman E, Senne DA, Myers TJ, Bulaga LL, Garber LP, Perdue ML, Lohman K, Daum  
812 LT, Suarez DL. 2002. Development of a real-time reverse transcriptase PCR assay for type A

- 813 influenza virus and the avian H5 and H7 hemagglutinin subtypes. *J Clin Microbiol* 40:3256-  
814 60.
- 815
- 816 50. Su W, Harfoot R, Su YCF, DeBeauchamp J, Joseph U, Jayakumar J, Crumpton JC, Jeevan T,  
817 Rubrum A, Franks J, Pascua PNQ, Kackos C, Zhang Y, Zhang M, Ji Y, Bui HT, Jones JC,  
818 Kercher L, Krauss S, Pleschka S, Chan MCW, Webster RG, Wu CY, Van Reeth K, Peiris M,  
819 Webby RJ, Smith GJD, Yen HL. 2021. Ancestral sequence reconstruction pinpoints  
820 adaptations that enable avian influenza virus transmission in pigs. *Nat Microbiol* 6:1455-  
821 1465.
- 822
- 823 51. Sun H, Xiao Y, Liu J, Wang D, Li F, Wang C, Li C, Zhu J, Song J, Jiang Z, Liu L, Zhang X,  
824 Wei K, Hou D, Pu J, Sun Y, Tong Q, Bi Y, Chang KC, Liu S, Gao GF. 2020. Prevalent  
825 Eurasian avian-like H1N1 swine influenza virus with 2009 pandemic viral genes facilitating  
826 human infection. *Proc Natl Acad Sci U S A* 117:17204-17210.
- 827
- 828 52. Taubenberger JK. 2019. Influenza's newest trick. *mBio* 10.
- 829
- 830 53. Thomas Y, Kaiser L. 2010. Seasonal and influenza A (H1N1) 2009 virus surveillance in  
831 Switzerland Season 2009 – 2010. Swiss Federal Office of Public Health:1-41.
- 832
- 833 54. Tong S, Li Y, Rivaller P, Conrardy C, Castillo DA, Chen LM, Recuenco S, Ellison JA,  
834 Davis CT, York IA, Turmelle AS, Moran D, Rogers S, Shi M, Tao Y, Weil MR, Tang K,  
835 Rowe LA, Sammons S, Xu X, Frace M, Lindblade KA, Cox NJ, Anderson LJ, Rupprecht  
836 CE, Donis RO. 2012. A distinct lineage of influenza A virus from bats. *Proc Natl Acad Sci U*  
837 *S A* 109:4269-74.
- 838

- 839 55. Tong S, Zhu X, Li Y, Shi M, Zhang J, Bourgeois M, Yang H, Chen X, Recuenco S, Gomez  
840 J, Chen LM, Johnson A, Tao Y, Dreyfus C, Yu W, McBride R, Carney PJ, Gilbert AT,  
841 Chang J, Guo Z, Davis CT, Paulson JC, Stevens J, Rupprecht CE, Holmes EC, Wilson IA,  
842 Donis RO. 2013. New world bats harbor diverse influenza A viruses. *PLoS Pathog*  
843 9:e1003657.  
844
- 845 56. Vincent AL, Anderson TK, Lager KM. 2020. A brief introduction to influenza A virus in  
846 swine. *Methods Mol Biol* 2123:249-271.  
847
- 848 57. Vonlanthen-Specker I, Stephan R, Sidler X, Moor D, Fraefel C, Bachofen C. 2021. Genetic  
849 diversity of hepatitis E virus type 3 in Switzerland - from stable to table. *Animals (Basel)* 11.  
850
- 851 58. Watzinger F, Suda M, Preuner S, Baumgartinger R, Ebner K, Baskova L, Niesters HG,  
852 Lawitschka A, Lion T. 2004. Real-time quantitative PCR assays for detection and monitoring  
853 of pathogenic human viruses in immunosuppressed pediatric patients. *J Clin Microbiol*  
854 42:5189-98.  
855
- 856 59. WHO. 1980. A revision of the system of nomenclature for influenza viruses: a WHO  
857 memorandum. *Bull World Health Organ.* 58(4):585-91.  
858
- 859 60. Yu, G, Smith DK, Zhu H, Guan Y, Lam TT. 2017. GGTREE: an R package for visualization  
860 and annotation of phylogenetic trees with their covariates and other associated data. *Methods*  
861 *in Ecology and Evolution* 8.1:28-36.  
862
- 863 61. Zell R, Groth M, Krumbholz A, Lange J, Philipps A, Dürrwald R. 2020. Cocirculation of  
864 swine H1N1 influenza A virus lineages in Germany. *Viruses* 12.
